# Supplementary material for: Zinc borylation and reduction by a diborane(4) species via B–O bond formation
Source: Royal Society of Chemistry journal article supplement (doi:10.1039/d4sc06389a), 2024-01-01
Supplement: d4sc06389a1.pdf [file d4sc06389a1.pdf]

## Zinc borylation and reduction by a diborane(4) species via B-O bond formation

Liam P. Griffin, Simon Aldridge\*

Inorganic Chemistry Laboratory, Department of Chemistry, University of Oxford, South Parks Road,  
Oxford, OX1 3QR (UK)

### Supporting Information (47 pages total)

#### Table of Contents

|                                            |     |
|--------------------------------------------|-----|
| 1. General Considerations                  | s2  |
| 2. X-ray crystallographic details          | s3  |
| 3. Syntheses of novel compounds            | s6  |
| 4. NMR spectra of novel compounds          | s9  |
| 5. Computational details and analysis      | s26 |
| 6. xyz-coordinates of optimised structures | s36 |
| 7. References for supporting information   | s47 |

## 1. General considerations

All manipulations were carried out using standard Schlenk line or dry-box techniques under an atmosphere of argon or dinitrogen. Solvents were degassed by sparging with argon and dried by passing through a column of the appropriate drying agent. Toluene and hexane were purified using an MBraun SPS-800 solvent purification system and stored over a potassium mirror. THF and Et<sub>2</sub>O were purified using an MBraun SPS-800 and stored over activated molecular sieves. NMR spectra were measured in benzene-d<sub>6</sub> (which was dried over potassium, with the solvent then being distilled under reduced pressure), or THF-d<sub>8</sub> (dried by storage over activated molecular sieves and degassed by three freeze pump thaw cycles) and stored under argon in Teflon valve ampoules. NMR samples were prepared under argon in 5 mm Wilmad 507-PP tubes fitted with J. Young Teflon valves. <sup>1</sup>H, <sup>13</sup>C{<sup>1</sup>H}, <sup>31</sup>P and <sup>11</sup>B NMR spectra were recorded on a Bruker Avance III HD nanobay 400 MHz or Bruker Avance III 500 MHz spectrometer at ambient temperature and referenced internally to residual protio-solvent (<sup>1</sup>H) or solvent (<sup>13</sup>C) resonances and are reported relative to tetramethylsilane or Et<sub>2</sub>O·BF<sub>3</sub> (δ = 0 ppm). Assignments were confirmed using two-dimensional <sup>1</sup>H-<sup>1</sup>H and <sup>13</sup>C-<sup>1</sup>H NMR correlation experiments. Chemical shifts are quoted in δ (ppm) and coupling constants in Hz. Elemental analyses were carried out by London Metropolitan University. B<sub>2</sub>pin<sub>2</sub>, HOBpin, DMAP, CO<sub>2</sub> and KO<sup>t</sup>Bu were used as received. MeI was degassed and stored over molecular sieves. (Nacnac<sup>Mes</sup>)ZnI,<sup>S1</sup> (Nacnac<sup>Mes</sup>)ZnMe,<sup>S2</sup> {(HCDippN)<sub>2</sub>}BOH<sup>S3</sup> were prepared according to literature procedures.

## 2. X-ray crystallographic details

Single-crystal X-ray diffraction data for compounds  $(\text{Nacnac}^{\text{Mes}})\text{Zn}(\text{DMAP})\text{Bpin}$  (**2**),  $(\text{Nacnac}^{\text{Mes}})\text{Zn}(\text{DMAP})\text{I}$  (**3**),  $[(\text{Nacnac}^{\text{Mes}})\text{ZnOBpin}]_2$  (**4**),  $(\text{Nacnac}^{\text{Mes}})\text{ZnOB}\{(\text{NDippCH})_2\}$  (**5**) and  $[(\text{Nacnac}^{\text{Mes}})\text{Zn}]_2$  (**VII**) were collected on an Oxford Diffraction/Agilent SuperNova diffractometer equipped with a 135 mm Atlas CCD area detector or a Rigaku XtaLAB Synergy-DW VHF equipped with a PhotonJet-R dual wavelength rotating anode and HyPix-Arc 150° detector. Crystals were selected under Paratone-N oil, mounted on MiTeGen Micromount loops and quench-cooled using an Oxford Cryosystems open flow N<sub>2</sub> cooling device.<sup>54</sup> Data were collected at 150 K using mirror monochromated Cu K $\alpha$  radiation ( $\lambda = 1.5418 \text{ \AA}$ ; Oxford Diffraction Supernova) or Mo K $\alpha$  radiation ( $\lambda = 0.71073 \text{ \AA}$ ; Oxford Diffraction Supernova). Data collected were processed using the CrysAlisPro package, including unit cell parameter refinement and inter-frame scaling (which was carried out using SCALE3 ABSPACK within CrysAlisPro).<sup>55</sup> Equivalent reflections were merged and diffraction patterns processed with the CrysAlisPro suite.<sup>55</sup> Structures were solved ab initio from the integrated intensities using SHELXT<sup>56</sup> and refined on  $F^2$  using SHELXL<sup>57</sup> with the graphical interface OLEX2.<sup>58</sup> Selected crystallographic data are summarised in Table S1 and full details are given in the supplementary deposited CIF files (CCDC 2385165-2385169). These data can be obtained free of charge from the Cambridge Crystallographic Data Centre via [http://www.ccdc.cam.ac.uk/data\\_request/cif](http://www.ccdc.cam.ac.uk/data_request/cif).

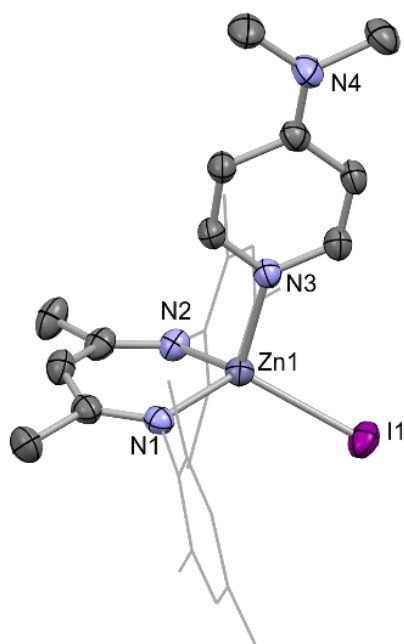

**Fig S1.** Molecular structure of  $(\text{Nacnac}^{\text{Mes}})\text{Zn}(\text{DMAP})\text{I}$ , as determined by single crystal X-ray crystallography. Hydrogen atoms omitted and some residues displayed as wireframe for clarity. Key bond lengths ( $\text{\AA}$ ) and bond angles ( $^\circ$ ): Zn1-N1 2.000(2), Zn1-N2 1.989(2), Zn1-N3 2.047(2), Zn1-I1 2.5572(5), N1-Zn1-N1 96.88(7), N3-Zn1-I1 106.46(5).

**Table S1.** Crystallographic data for compounds  $(Nacnac^{Mes})Zn(DMAP)Bpin$  (**2**),  $(Nacnac^{Mes})Zn(DMAP)I$  (**3**),  $[(Nacnac^{Mes})ZnOBpin]_2$  (**4**),  $(Nacnac^{Mes})ZnOB\{(NDippCH)_2\}$  (**5**) and  $[(Nacnac^{Mes})Zn]_2$  (**VII**).

| Compound                                | <b>2</b>                                                          | <b>3</b>                                                                            | <b>4</b>                                                                                     |
|-----------------------------------------|-------------------------------------------------------------------|-------------------------------------------------------------------------------------|----------------------------------------------------------------------------------------------|
| Formula                                 | C <sub>36</sub> H <sub>51</sub> BN <sub>4</sub> O <sub>2</sub> Zn | C <sub>30</sub> H <sub>39</sub> IN <sub>4</sub> Zn(C <sub>6</sub> H <sub>14</sub> ) | C <sub>58</sub> H <sub>82</sub> B <sub>2</sub> N <sub>4</sub> O <sub>6</sub> Zn <sub>2</sub> |
| Fw (g mol <sup>-1</sup> )               | 647.98                                                            | 734.09                                                                              | 1083.63                                                                                      |
| Crystal system                          | Monoclinic                                                        | Monoclinic                                                                          | Monoclinic                                                                                   |
| Space group                             | P 2 <sub>1</sub> /c                                               | P 2 <sub>1</sub> /n                                                                 | P 2 <sub>1</sub> /n                                                                          |
| a (Å)                                   | 13.88904(6)                                                       | 8.60930(10)                                                                         | 14.94854(6)                                                                                  |
| b (Å)                                   | 26.07802(12)                                                      | 29.1368(3)                                                                          | 11.80920(5)                                                                                  |
| c (Å)                                   | 2016258(9)                                                        | 14.2475(2)                                                                          | 16.28848(6)                                                                                  |
| α (°)                                   | 90                                                                | 90                                                                                  | 90                                                                                           |
| β (°)                                   | 92.9187(4)                                                        | 91.3760(10)                                                                         | 91.3130(4)                                                                                   |
| γ (°)                                   | 90                                                                | 90                                                                                  | 90                                                                                           |
| V (Å <sup>-3</sup> )                    | 7293.39(5)                                                        | 3572.92(7)                                                                          | 2874.654(19)                                                                                 |
| Z                                       | 8                                                                 | 4                                                                                   | 2                                                                                            |
| ρ <sub>calc</sub> (g cm <sup>-3</sup> ) | 1.180                                                             | 1.365                                                                               | 1.252                                                                                        |
| Radiation, λ (Å)                        | 1.54184                                                           | 1.54184                                                                             | 1.54184                                                                                      |
| Absorption                              | Multi-scan                                                        | Multi-scan                                                                          | Multi-scan                                                                                   |
| μ (mm <sup>-1</sup> )                   | 1.196                                                             | 7.943                                                                               | 1.423                                                                                        |
| Reflections collected                   | 325188                                                            | 79811                                                                               | 100530                                                                                       |
| Independent reflections                 | 15080                                                             | 7460                                                                                | 5915                                                                                         |
| R <sub>(int)</sub>                      | 0.0730                                                            | 0.0466                                                                              | 0.0397                                                                                       |
| Parameters                              | 821                                                               | 335                                                                                 | 414                                                                                          |
| R <sub>1</sub> (all data/ >2σ(I))       | 0.0386                                                            | 0.0250                                                                              | 0.0316                                                                                       |
| ωR <sub>2</sub> (all data/ >2σ(I))      | 0.1124                                                            | 0.0622                                                                              | 0.0864                                                                                       |
| Goof                                    | 1.079                                                             | 1.039                                                                               | 1.095                                                                                        |
| T (K)                                   | 100.00(10)                                                        | 149.98(16)                                                                          | 100.00(10)                                                                                   |
| CCDC reference number                   | 2385165                                                           | 2385169                                                                             | 2385167                                                                                      |

Table S1 contd.

|                                             | 5                                                   | VIII                                                           |
|---------------------------------------------|-----------------------------------------------------|----------------------------------------------------------------|
| <b>Formula</b>                              | C <sub>49</sub> H <sub>65</sub> BN <sub>4</sub> OZn | C <sub>46</sub> H <sub>58</sub> N <sub>4</sub> Zn <sub>2</sub> |
| <b>Fw (g mol<sup>-1</sup>)</b>              | 802.23                                              | 797.70                                                         |
| <b>Crystal system</b>                       | Monoclinic                                          | Orthorhombic                                                   |
| <b>Space group</b>                          | P 1 2 <sub>1</sub> /c 1                             | P b c a                                                        |
| <b>a (Å)</b>                                | 16.1404(2)                                          | 21.7767(2)                                                     |
| <b>b (Å)</b>                                | 15.15920(10)                                        | 10.91670(10)                                                   |
| <b>c (Å)</b>                                | 19.0592(2)                                          | 36.1028(4)                                                     |
| <b>α (°)</b>                                | 90                                                  | 90                                                             |
| <b>β (°)</b>                                | 101.4280(10)                                        | 90                                                             |
| <b>γ (°)</b>                                | 90                                                  | 90                                                             |
| <b>V (Å<sup>-3</sup>)</b>                   | 4570.87(8)                                          | 8582.71(15)                                                    |
| <b>Z</b>                                    | 4                                                   | 8                                                              |
| <b>ρ<sub>calc</sub> (g cm<sup>-3</sup>)</b> | 1.166                                               | 1.235                                                          |
| <b>Radiation, λ (Å)</b>                     | 1.54184                                             | 1.54184                                                        |
| <b>Absorption</b>                           | Multi-scan                                          | Multi-scan                                                     |
| <b>μ (mm<sup>-1</sup>)</b>                  | 1.030                                               | 1.626                                                          |
| <b>Reflections collected</b>                | 103585                                              | 130609                                                         |
| <b>Independent reflections</b>              | 9545                                                | 8834                                                           |
| <b>R<sub>(int)</sub></b>                    | 0.0488                                              | 0.0747                                                         |
| <b>Parameters</b>                           | 542                                                 | 485                                                            |
| <b>R<sub>1</sub> (all data/ &gt;2σ(I))</b>  | 0.0319                                              | 0.0803                                                         |
| <b>ωR<sub>2</sub> (all data/ &gt;2σ(I))</b> | 0.0921                                              | 0.1829                                                         |
| <b>GooF</b>                                 | 1.033                                               | 1.162                                                          |
| <b>T (K)</b>                                | 149.98(11)                                          | 100.00(10)                                                     |
| <b>CCDC reference number</b>                | 2385168                                             | 2385166                                                        |

### 3. Synthesis of novel compounds

#### (Nacnac<sup>Mes</sup>)ZnBpin (1)

To an NMR tube fitted with a J-Youngs valve was added KO<sup>t</sup>Bu (0.004 g, 0.04 mmol) and B<sub>2</sub>pin<sub>2</sub> (0.01 g, 0.04 mmol) and C<sub>6</sub>D<sub>6</sub> (0.5 ml). The suspension was heated to 80 °C for 1 h with occasional ultrasonication to yield a homogeneous mixture. To this was added (Nacnac<sup>Mes</sup>)ZnI (0.02 g, 0.038 mmol) before further heating at 80 °C for 12 h. The resulting solution was filtered to remove precipitated KI and the product was characterised by multinuclear NMR spectroscopy. This indicated quantitative conversion. Also present were signals corresponding to the by-product <sup>t</sup>BuOBpin.<sup>59</sup>

#### (Nacnac<sup>Mes</sup>)ZnBpin

<sup>1</sup>H NMR (500 MHz, benzene-d<sub>6</sub>, 298 K): δ<sub>H</sub> 1.02 (12 H, s, {OC(CH<sub>3</sub>)<sub>2</sub>})<sub>2</sub>), 1.64 (6 H, s, Nacnac-CH<sub>3</sub>), 2.17 (6 H, s, *p*-CH<sub>3</sub>), 2.20 (12 H, s, *o*-CH<sub>3</sub>), 4.99 (1 H, s, CH), 6.82 (4 H, s, Ar-H) ppm.

<sup>13</sup>C{<sup>1</sup>H} NMR (101 MHz, benzene-d<sub>6</sub>): δ<sub>C</sub> 19.0 (*o*-CH<sub>3</sub>), 21.0 (*p*-CH<sub>3</sub>), 22.6 (Nacnac-CH<sub>3</sub>), 25.2, ({OC(CH<sub>3</sub>)<sub>2</sub>})<sub>2</sub>), 83.1 (OC(CH<sub>3</sub>)<sub>2</sub>), 96.1 (Nacnac-CH), 129.3 (Ar-CH), 131.2 (Ar-CCH<sub>3</sub>), 133.4 (Ar-CCH<sub>3</sub>), 146.1 (Ar-CN), 166.4 (Nacnac-CN) ppm.

<sup>11</sup>B NMR (128 MHz, benzene-d<sub>6</sub>, 298 K): δ<sub>B</sub> 38.8 (br) ppm

#### <sup>t</sup>BuOBpin

<sup>1</sup>H NMR (500 MHz, benzene-d<sub>6</sub>, 298 K): δ<sub>H</sub> 1.06 (12 H, s, {OC(CH<sub>3</sub>)<sub>2</sub>})<sub>2</sub>), 1.38 (9 H, s, C(CH<sub>3</sub>)<sub>3</sub>) ppm.

<sup>13</sup>C{<sup>1</sup>H} NMR (101 MHz, benzene-d<sub>6</sub>): δ<sub>C</sub> 24.6 ({OC(CH<sub>3</sub>)<sub>2</sub>})<sub>2</sub>), 30.3 (C(CH<sub>3</sub>)<sub>3</sub>), 73.5 (C(CH<sub>3</sub>)<sub>3</sub>), 81.76 (OC(CH<sub>3</sub>)<sub>2</sub>) ppm.

<sup>11</sup>B NMR (128 MHz, benzene-d<sub>6</sub>, 298 K): δ<sub>B</sub> 21.7 ppm

#### (Nacnac<sup>Mes</sup>)Zn(DMAP)Bpin (2)

To an *in situ* generated solution of (Nacnac<sup>Mes</sup>)ZnBpin (0.1 mmol, 0.7 mL) in C<sub>6</sub>D<sub>6</sub> (ca. 1 mL) was added DMAP (0.012 g, 0.1 mmol). The sample was sonicated briefly to aid dissolution of the DMAP, at which point NMR spectroscopy indicated that conversion was complete. Removal of volatiles *in vacuo*, extraction into hexane and filtration yielded a colourless solution. Single crystals suitable for X-ray crystallography were obtained by slow evaporation of the hexane solution. Yield 0.047 g (73 %).

<sup>1</sup>H NMR (500 MHz, benzene-d<sub>6</sub>, 298 K): δ<sub>H</sub> 0.97 (12 H, s, {OC(CH<sub>3</sub>)<sub>2</sub>})<sub>2</sub>), 1.81 (6 H, s, Nacnac-CH<sub>3</sub>), 2.13 (6 H, s, N(CH<sub>3</sub>)<sub>2</sub>), 2.18 (6 H, s, *p*-CH<sub>3</sub>), 2.27 (12 H, s, *o*-CH<sub>3</sub>), 5.00 (1 H, s, CH), 6.02 (2 H, d, <sup>3</sup>J<sub>HH</sub> = 6.24 Hz, DMAP-*m*-CH), 6.84 (4 H, s, Ar-H), 8.64 (2 H, d, <sup>3</sup>J<sub>HH</sub> = 6.24 Hz, DMAP-*o*-CH) ppm.

<sup>13</sup>C{<sup>1</sup>H} NMR (101 MHz, benzene-d<sub>6</sub>): δ<sub>C</sub> 19.2 (*o*-CH<sub>3</sub>), 21.0 (*p*-CH<sub>3</sub>), 23.1 (Nacnac-CH<sub>3</sub>), 25.7, ({OC(CH<sub>3</sub>)<sub>2</sub>})<sub>2</sub>), 38.2 (N(CH<sub>3</sub>)<sub>2</sub>), 80.3 (OC(CH<sub>3</sub>)<sub>2</sub>), 93.7 (Nacnac-CH), 106.6 (DMAP-*m*-CH), 129.2 (Ar-CCH<sub>3</sub>), 131.7 (Ar-CH), 132.3 (Ar-CCH<sub>3</sub>), 147.6 (Ar-CN), 150.5 (DMAP-*o*-CH), 154.4 (DMAP-*p*-CN), 165.2 (Nacnac-CN) ppm.

<sup>11</sup>B NMR (128 MHz, benzene-d<sub>6</sub>, 298 K): δ<sub>B</sub> 40.1 (br.) ppm

Elemental Microanalysis – Expected for C<sub>36</sub>H<sub>51</sub>BN<sub>4</sub>O<sub>2</sub>Zn: C 66.73, H 7.93, N 8.65 %. Found: C 67.04, H 8.00, N 8.27 %.

### Reaction of (Nacnac<sup>Mes</sup>)ZnBpin (1) with MeI

To an *in situ* generated C<sub>6</sub>D<sub>6</sub> solution of **1** (0.038 mmol, 0.5 mL) was added MeI (0.02 mL, excess). Immediate reaction yielded the known species (Nacnac<sup>Mes</sup>)ZnI and MeBpin, as determined by *in situ* NMR spectroscopy.

### Reaction of (Nacnac<sup>Mes</sup>)Zn(DMAP)Bpin (2) with MeI

To a solution of **2** (0.01 g, 0.015 mmol) in C<sub>6</sub>D<sub>6</sub> (0.5 mL) was added MeI (0.02 mL, excess). Immediate reaction yielded the known species MeBpin, as well as a new species. Removal of volatiles, extraction into hexane and filtration yielded a colourless solution, from which colourless single crystals could be obtained when left to stand. Single crystal crystallographic measurements showed that this new species was (Nacnac<sup>Mes</sup>)Zn(DMAP)I, for which an alternative synthesis was conducted by analogy to the reported chloride analogue, yielding a clean sample for the measurement of characterising data.<sup>510</sup>

(Nacnac<sup>Mes</sup>)Zn(DMAP)I

<sup>1</sup>H NMR (500 MHz, benzene-d<sub>6</sub>, 298 K): δ<sub>H</sub> 1.63 (6 H, s (br.), *o*-CH<sub>3</sub>), 1.65 (6 H, s, Nacnac-CH<sub>3</sub>), 2.18 (6 H, s, *p*-CH<sub>3</sub>), 2.21 (6 H, s (br.), *o*-CH<sub>3</sub>), 3.05 (6 H, s, N(CH<sub>3</sub>)<sub>2</sub>), 4.84 (1 H, s, CH), 6.66 (2 H, s, Ar-H), 6.67 (2 H, br., DMAP-*m*-CH), 6.79 (2 H, s, Ar-H), 8.20 (2 H, d (br.), <sup>3</sup>J<sub>HH</sub> = 4.86 Hz, DMAP-*o*-CH) ppm.

<sup>13</sup>C{<sup>1</sup>H} NMR (101 MHz, benzene-d<sub>6</sub>): δ<sub>C</sub> 18.9, 20.1 (*o*-CH<sub>3</sub>), 21.1 (*p*-CH<sub>3</sub>), 23.8 (Nacnac-CH<sub>3</sub>), 39.2 (N(CH<sub>3</sub>)<sub>2</sub>), 93.9 (Nacnac-CH), 107.5 (DMAP-*m*-CH), 129.4, 130.0 (Ar-CH), 132.0, 133.1, 133.7 (Ar-CCH<sub>3</sub>), 146.3 (Ar-CN), 149.6 (DMAP-*o*-CH), 156.6 (DMAP-*p*-CN), 167.9 (Nacnac-CN) ppm.

### Reaction of (Nacnac<sup>Mes</sup>)ZnBpin (1) with CO<sub>2</sub>

An *in situ* generated C<sub>6</sub>D<sub>6</sub> solution of **1** (0.5 mmol, 0.6 mL) was degassed by three freeze-pump-thaw cycles before the addition of one atmosphere of CO<sub>2</sub>. Heating to 80 °C for 16 h led to the formation of one predominant species by *in situ* <sup>1</sup>H NMR spectroscopy (and CO by <sup>13</sup>C{<sup>1</sup>H} NMR). Removal of volatiles, extraction into hexane and filtration yielded a colourless solution, from which colourless single crystals could be obtained when left to stand. These crystals were suitable for X-ray crystallographic measurements. The minor species observed by NMR exactly matches the signals of the known species [(Nacnac<sup>Mes</sup>)Zn]<sub>2</sub>. An alternative direct synthesis of [(Nacnac<sup>Mes</sup>)ZnOBpin]<sub>2</sub> (**4**) is given below.

### [(Nacnac<sup>Mes</sup>)ZnOBpin]<sub>2</sub> (4)

To a mixture of (Nacnac<sup>Mes</sup>)ZnMe (0.02 g, 0.048 mmol) and HOBpin (0.007 g, 0.049 mmol) was added benzene (0.5 mL), leading to immediate bubbling of the solution, which ceased after ca. 1 min. The resulting solution was left to stand, resulting in the formation of large colourless crystals of [(Nacnac<sup>Mes</sup>)ZnOBpin]<sub>2</sub>. The supernatant solution was decanted, and the crystals were washed with hexane (0.5 mL), before removal of all remaining volatiles *in vacuo*.

<sup>1</sup>H NMR (500 MHz, THF-d<sub>8</sub>, 298 K): δ<sub>H</sub> 1.01 (12 H, s, {OC(CH<sub>3</sub>)<sub>2</sub>})<sub>2</sub>, 1.37 (6 H, s, Nacnac-CH<sub>3</sub>), 1.78 (12 H, s, *o*-CH<sub>3</sub>), 2.37 (6 H, s, *p*-CH<sub>3</sub>), 4.69 (1 H, s, CH), 6.72 (4 H, s, Ar-H) ppm.

$^{13}\text{C}\{^1\text{H}\}$  NMR (101 MHz, THF- $d_8$ ):  $\delta_{\text{C}}$  18.8 (*o*-CH<sub>3</sub>), 21.4 (*p*-CH<sub>3</sub>), 23.3 (Nacnac-CH<sub>3</sub>), 25.4 ( $\{\text{OC}(\text{CH}_3)_2\}_2$ ), 81.8 ( $\text{OC}(\text{CH}_3)_2$ ), 95.0 (Nacnac-CH), 130.0 (Ar-CH), 132.9 (Ar-CCH<sub>3</sub>), 133.1 (Ar-CCH<sub>3</sub>), 146.5 (Ar-CN), 168.1 (Nacnac-CN) ppm.

$^{11}\text{B}$  NMR (128 MHz, THF- $d_8$ , 298 K):  $\delta_{\text{B}}$  22.6 (br.) ppm

### (Nacnac<sup>Mes</sup>)ZnOB{(NDippCH)<sub>2</sub>} (5)

To a mixture of (Nacnac<sup>Mes</sup>)ZnMe (0.2 g, 0.48 mmol) and  $\{(\text{HCDippN})_2\}\text{BOH}$  (0.195 g, 0.48 mmol) in a J-Young ampoule was added toluene (5 mL) before stirring at 80 °C for 16 h, during which gas evolution could be observed. Evaporation of volatiles *in vacuo* yielded a sticky solid. Extraction into hexane (5 mL), filtration and removal of solvent *in vacuo* afforded an off-white powder. Single crystals could be obtained by recrystallisation of a portion of this material by slow evaporation from hexane. These crystals were suitable for single crystal X-ray crystallographic measurements. Yield 0.311 g (80 %).

$^1\text{H}$  NMR (500 MHz, benzene- $d_6$ , 298 K):  $\delta_{\text{H}}$  1.00 (12 H, d,  $^3J_{\text{HH}} = 6.91$  Hz, CH(CH<sub>3</sub>)<sub>2</sub>), 1.21 (12 H, d,  $^3J_{\text{HH}} = 6.91$  Hz, CH(CH<sub>3</sub>)<sub>2</sub>), 1.36 (6 H, s, Nacnac-CH<sub>3</sub>), 1.78 (12 H, s, *o*-CH<sub>3</sub>), 2.24 (6 H, s, *p*-CH<sub>3</sub>), 3.37 (4 H, sept.,  $^3J_{\text{HH}} = 7.01$  Hz, CH(CH<sub>3</sub>)<sub>2</sub>) 4.73 (1 H, s, CH), 5.90 (2 H, s, {DippNCH}<sub>2</sub>) 6.65 (4 H, s, Ar-H), 7.11 (4 H, d (br.),  $^3J_{\text{HH}} = 7.57$  Hz, Ar-*m*-H), 7.21 (2 H, d (br.),  $^3J_{\text{HH}} = 7.57$  Hz, Ar-*p*-H) ppm.

$^{13}\text{C}\{^1\text{H}\}$  NMR (101 MHz, benzene- $d_6$ ):  $\delta_{\text{C}}$  18.1 (*o*-CH<sub>3</sub>), 21.1 (*p*-CH<sub>3</sub>), 23.0 (Nacnac-CH<sub>3</sub>), 23.7 (CH(CH<sub>3</sub>)<sub>2</sub>), 23.9 (CH(CH<sub>3</sub>)<sub>2</sub>), 28.7 (CH(CH<sub>3</sub>)<sub>2</sub>), 95.6 (Nacnac-CH), 115.6 ( $\{\text{DippNCH}\}_2$ ), 123.3 (Dipp-*m*-CH), 129.9 (Mes-*m*-CH), 131.0 (Mes-CCH<sub>3</sub>), 133.9 (Mes-CCH<sub>3</sub>), 141.1 (Dipp-CN), 143.9 (Mes-CN), 146.6 (Dipp-CCH(CH<sub>3</sub>)<sub>2</sub>), 170.0 (Nacnac-CN) ppm.

$^{11}\text{B}$  NMR (128 MHz, benzene- $d_6$ , 298 K):  $\delta_{\text{B}}$  21.5 ppm

Elemental Microanalysis – Expected for C<sub>49</sub>H<sub>65</sub>BN<sub>4</sub>OZn: C 73.36, H 8.17, N 6.98 %. Found: C 73.72, H 8.00, N 6.63 %.

### Reaction of (Nacnac<sup>Mes</sup>)ZnBpin (1) with (Nacnac<sup>Mes</sup>)ZnOB{(NDippCH)<sub>2</sub>} (5)

To an *in situ* generated C<sub>6</sub>D<sub>6</sub> solution of **1** (0.38 mmol, 0.5 mL) was added **5** (0.03 g, 0.037 mmol), before heating to 80 °C for 12 h. NMR spectroscopy indicates clean conversion to the known species [(Nacnac<sup>Mes</sup>)Zn]<sub>2</sub> and one new species, which gives rise to signals consistent with the proposed complex  $\{(\text{HCDippN})_2\}\text{BOBpin}$ .<sup>[1]</sup> Attempts at crystallisation yielded only crystals of [(Nacnac<sup>Mes</sup>)Zn]<sub>2</sub>, as well as a sticky gel-like substance assigned to the  $\{(\text{HCNDipp})_2\}\text{BOBpin}$  by-product.

$\{(\text{HCDippN})_2\}\text{BOBpin}$

$^1\text{H}$  NMR (500 MHz, benzene- $d_6$ , 298 K):  $\delta_{\text{H}}$  0.69 (12 H, s,  $\{\text{OCCH}_3\}_2$ ), 1.25 (12 H, d,  $^3J_{\text{HH}} = 7.00$  Hz, CH(CH<sub>3</sub>)<sub>2</sub>), 1.39 (12 H, d,  $^3J_{\text{HH}} = 7.00$  Hz, CH(CH<sub>3</sub>)<sub>2</sub>), 3.40 (4 H, sept.,  $^3J_{\text{HH}} = 7.00$  Hz, CH(CH<sub>3</sub>)<sub>2</sub>), 6.01 (2 H, s, {DippNCH}<sub>2</sub>), 7.15 (4 H, br., Ar-*m*-H), 7.20 (2 H, m, Ar-*p*-H) ppm.

$^{13}\text{C}\{^1\text{H}\}$  NMR (101 MHz, benzene- $d_6$ ):  $\delta_{\text{C}}$  24.3 ( $\{\text{OC}(\text{CH}_3)_2\}_2$ ), 24.6 (CH(CH<sub>3</sub>)<sub>2</sub>), 24.8 (CH(CH<sub>3</sub>)<sub>2</sub>), 30.3 (CH(CH<sub>3</sub>)<sub>2</sub>), 82.2 ( $\text{OC}(\text{CH}_3)_2$ ), 117.0 ( $\{\text{DippNCH}\}_2$ ), 123.7, 129.3, 138.0 (Ar-C), 146.9 (Ar-CN) ppm.

$^{11}\text{B}$  NMR (128 MHz, benzene- $d_6$ , 298 K):  $\delta_{\text{B}}$  20.8, 21.7 ppm



#### 4. NMR Spectra of novel compounds

##### (Nacnac<sup>Mes</sup>)ZnBpin (1)

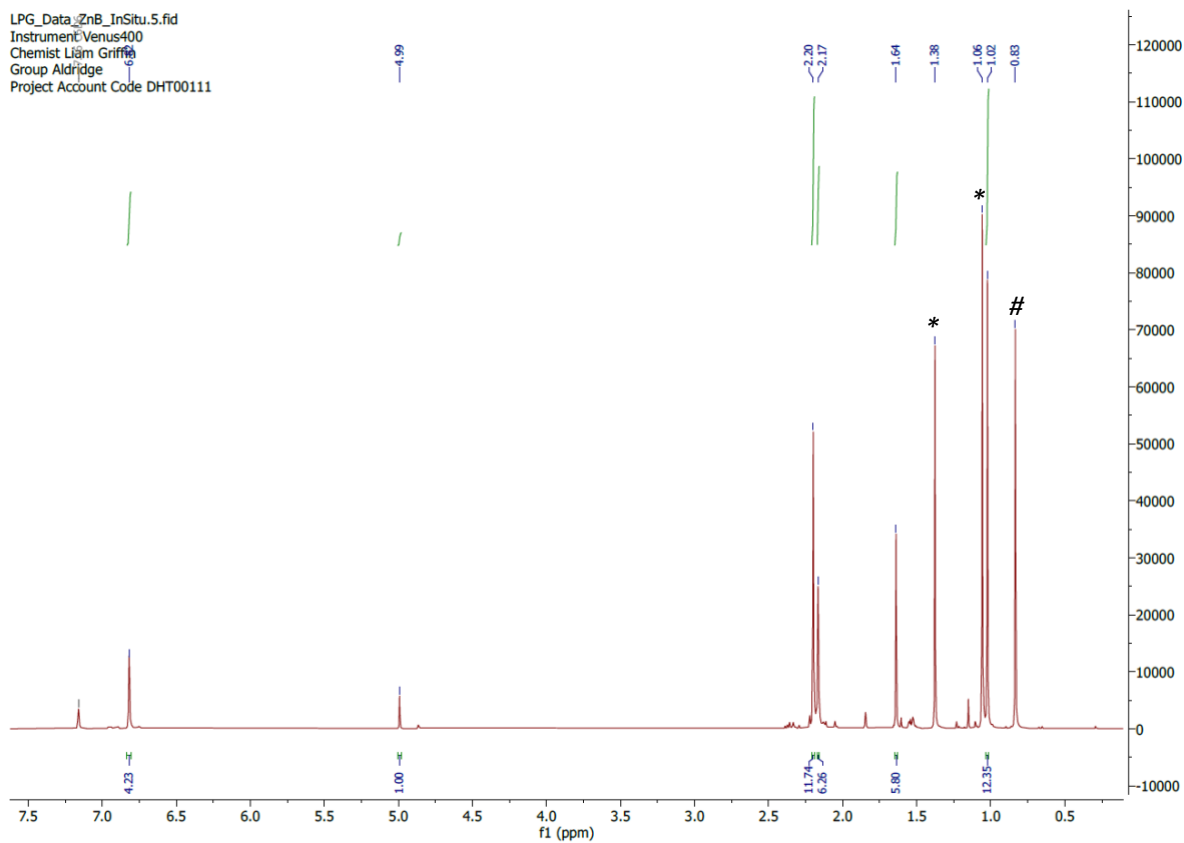

**Fig S2.** *In situ* <sup>1</sup>H NMR spectrum of (Nacnac<sup>Mes</sup>)ZnBpin (1). <sup>t</sup>BuOBPin by-product marked \* and residual B<sub>2</sub>pin<sub>2</sub> marked #.

LPG\_Data\_ZnB\_InSitu.7.fid  
Instrument Venus400  
Chemist Liam Griffin  
Group Aldridge  
Project Account Code DHT00111

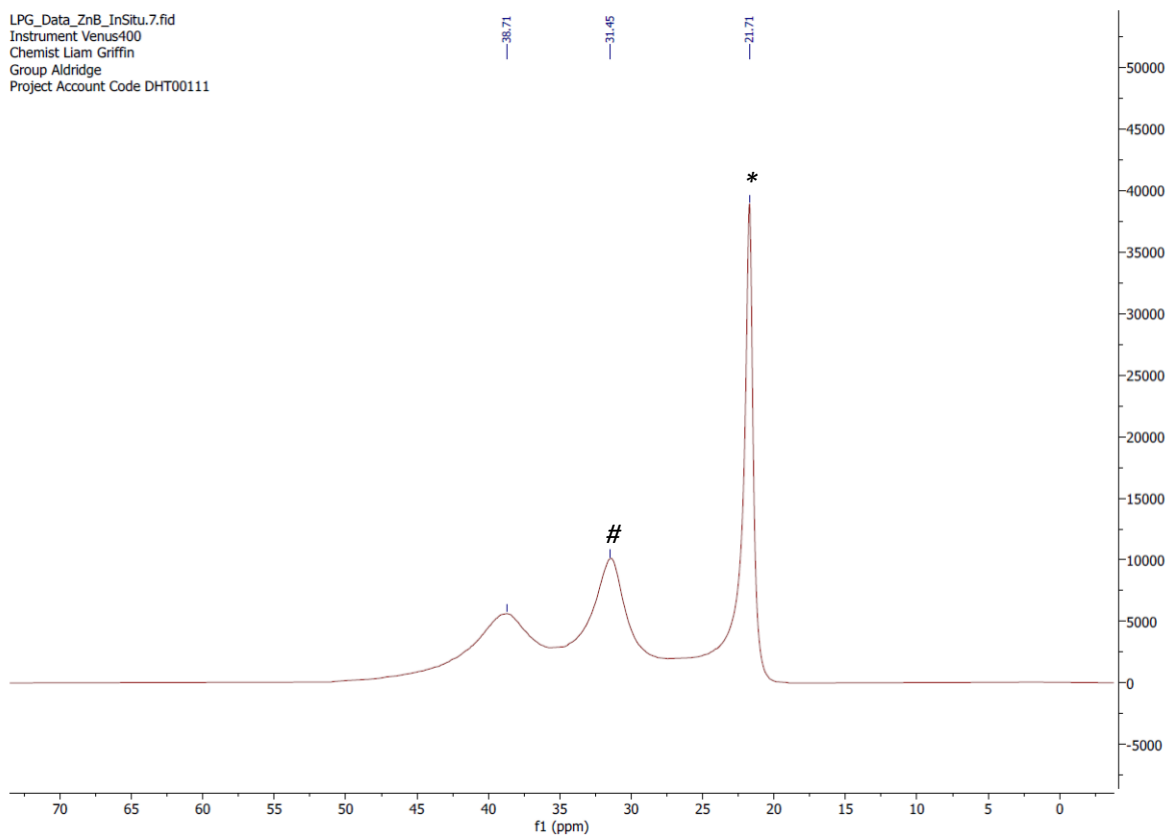

**Fig S3.** *In situ*  $^{11}\text{B}$  NMR spectrum of  $(\text{Nacnac}^{\text{Mes}})\text{ZnBpin}$  (**1**).  $^t\text{BuOBPin}$  by-product marked \* and residual  $\text{B}_2\text{pin}_2$  marked #.

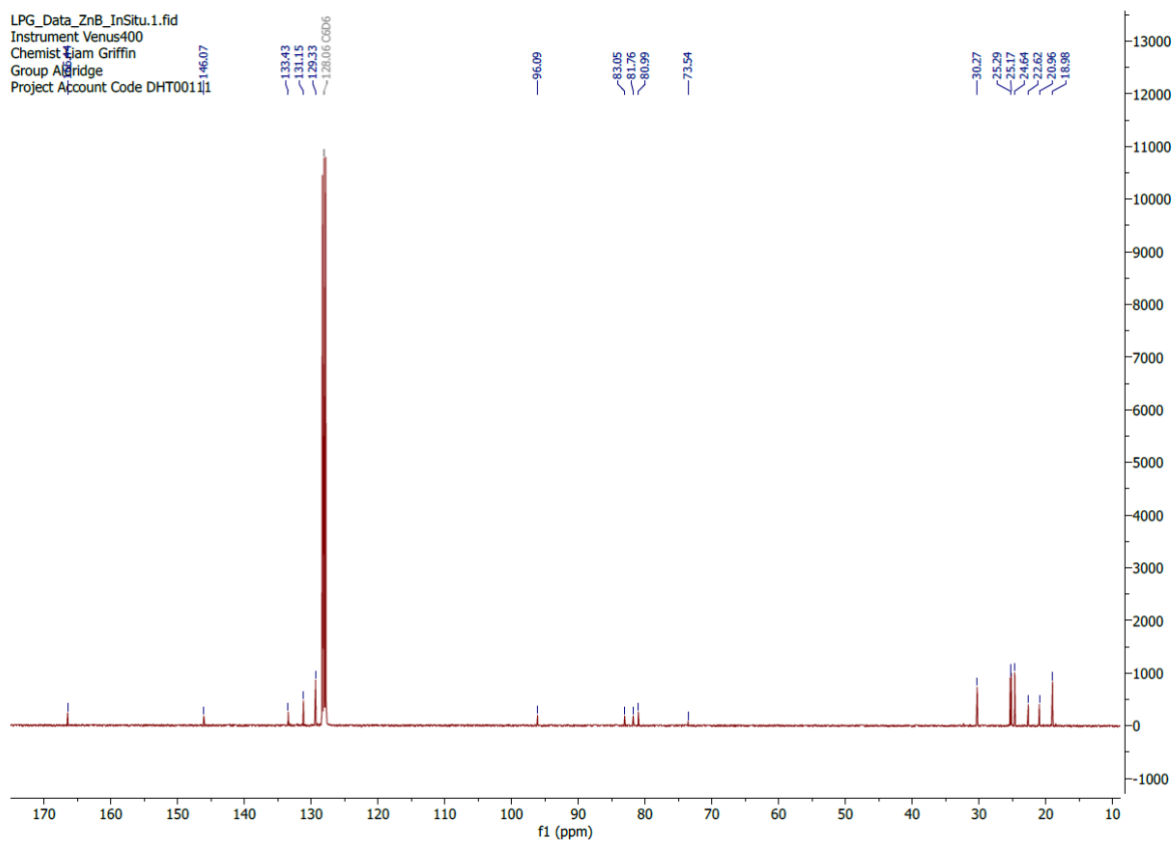

Fig S4. *In situ*  $^{13}\text{C}$  NMR spectrum of  $(\text{Nacnac}^{\text{Mes}})\text{ZnBpin}$  (**1**).

**(Nacnac<sup>Mes</sup>)Zn(DMAP)Bpin (2)**

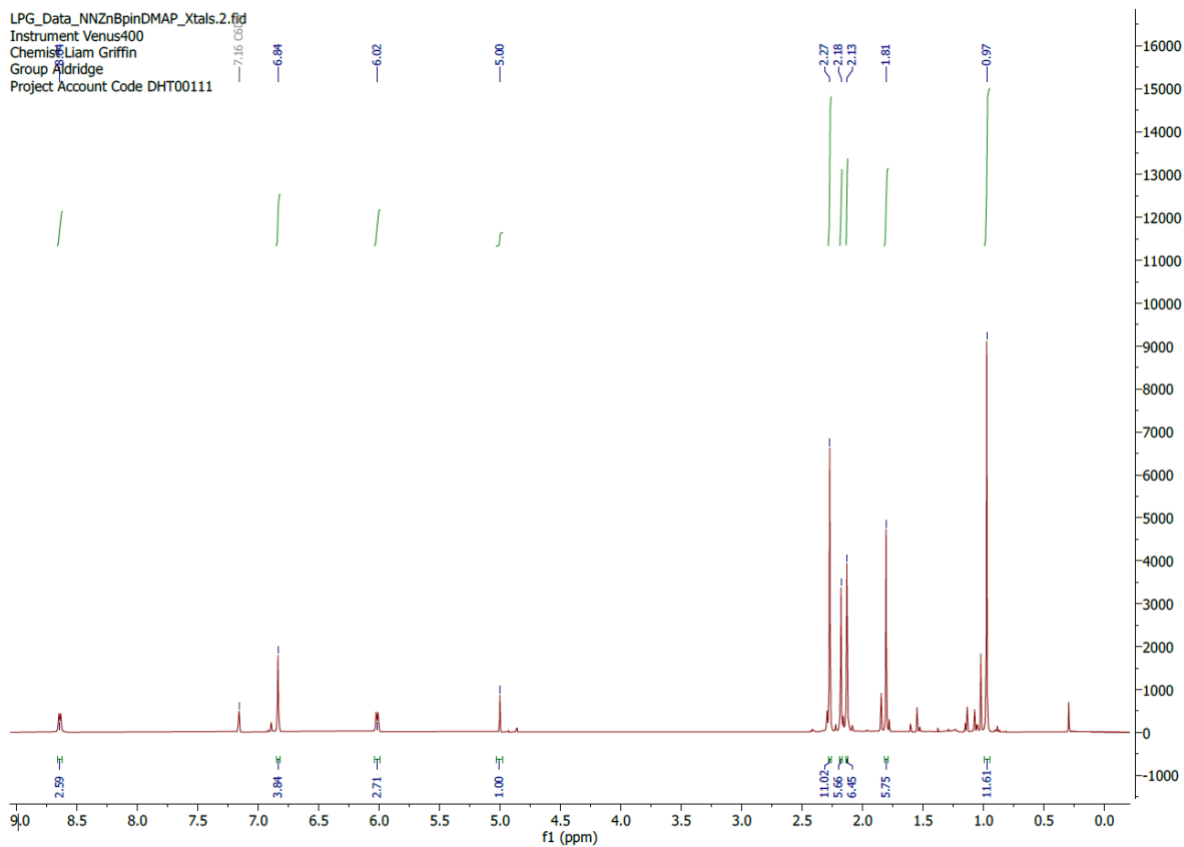

**Fig S5.** <sup>1</sup>H NMR spectrum of (Nacnac<sup>Mes</sup>)Zn(DMAP)Bpin (2).

NMR/New folder/LPG\_NNznBPIn\_DMAP\_Chk/2/fid

LPG\_NNznBPIn\_DMAP\_Chk.2.fid  
Date: 2024-08-21T16:37:57  
11B-NMR (128.40 MHz, C6D6, 1024 scans)  
Instrument Venus400  
Chemist Liam Griffin  
Group Aldridge  
Project Account Code DHT00111

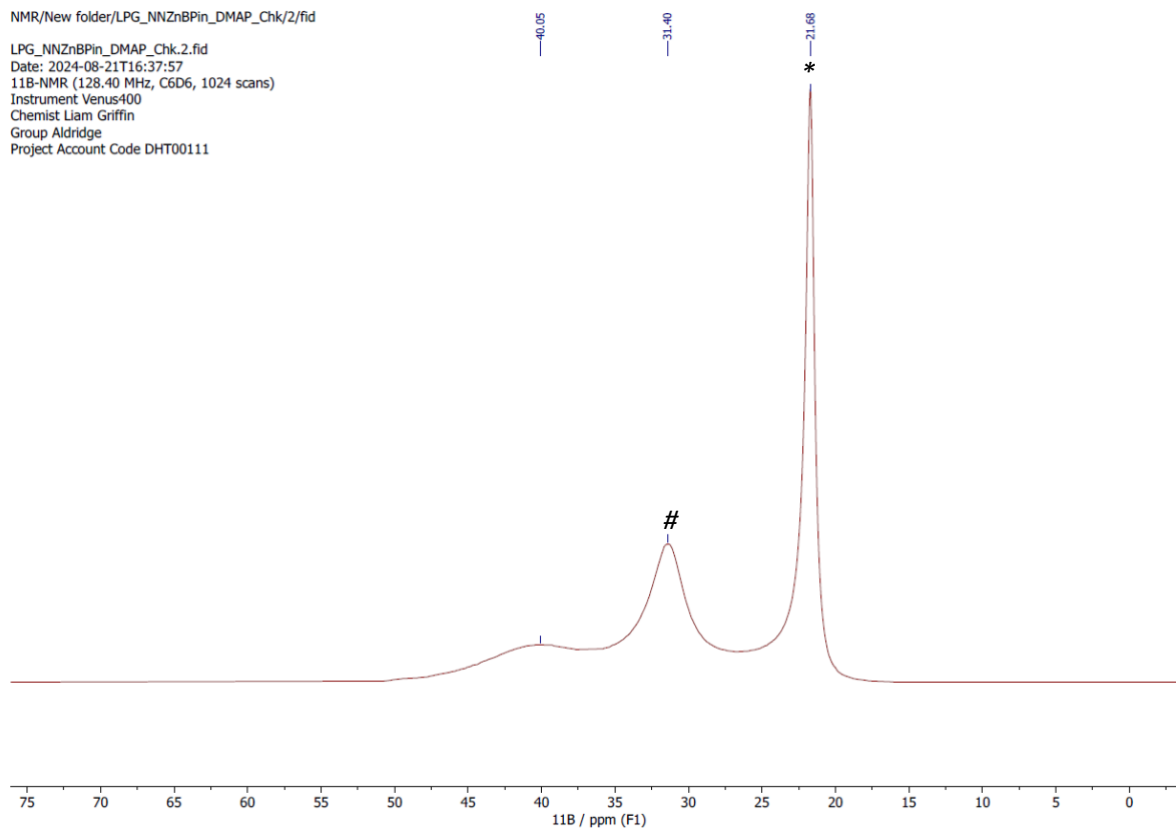

**Fig S6.** *In situ*  $^{11}\text{B}$  NMR spectrum of  $(\text{Nacnac}^{\text{Mes}})\text{Zn}(\text{DMAP})\text{Bpin}$  (**2**).  $^t\text{BuOBPin}$  by-product marked \* and residual  $\text{B}_2\text{pin}_2$  marked #.

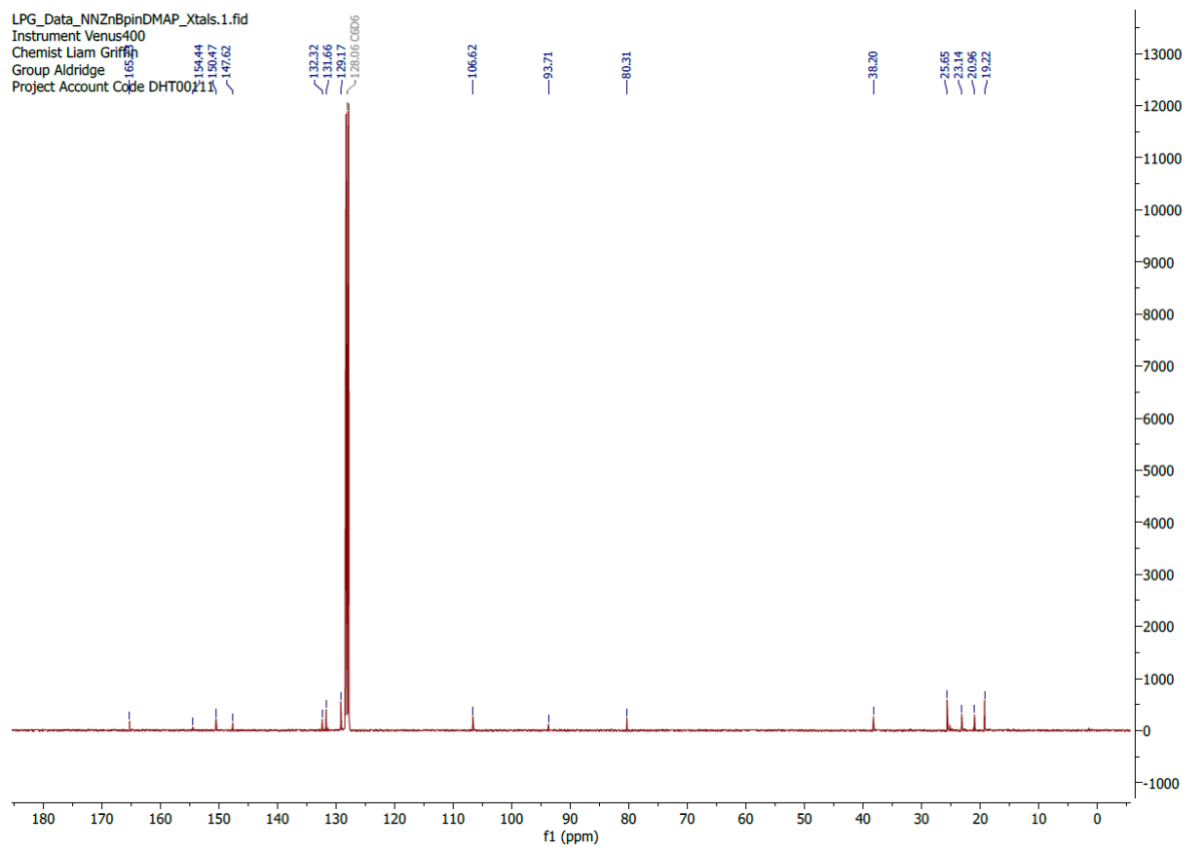

**Fig S7.**  $^{13}\text{C}$  NMR spectrum of  $(\text{Nacnac}^{\text{Mes}})\text{Zn}(\text{DMAP})\text{Bpin}$  (**2**).

**(Nacnac<sup>Mes</sup>)Zn(DMAP)I (3)**

LPG\_NNZnDMAPI\_adjusted.1.fid  
Instrument Venus400  
Chemist Liam Griffin  
Group Aldridge  
Project Account Code DHT00111

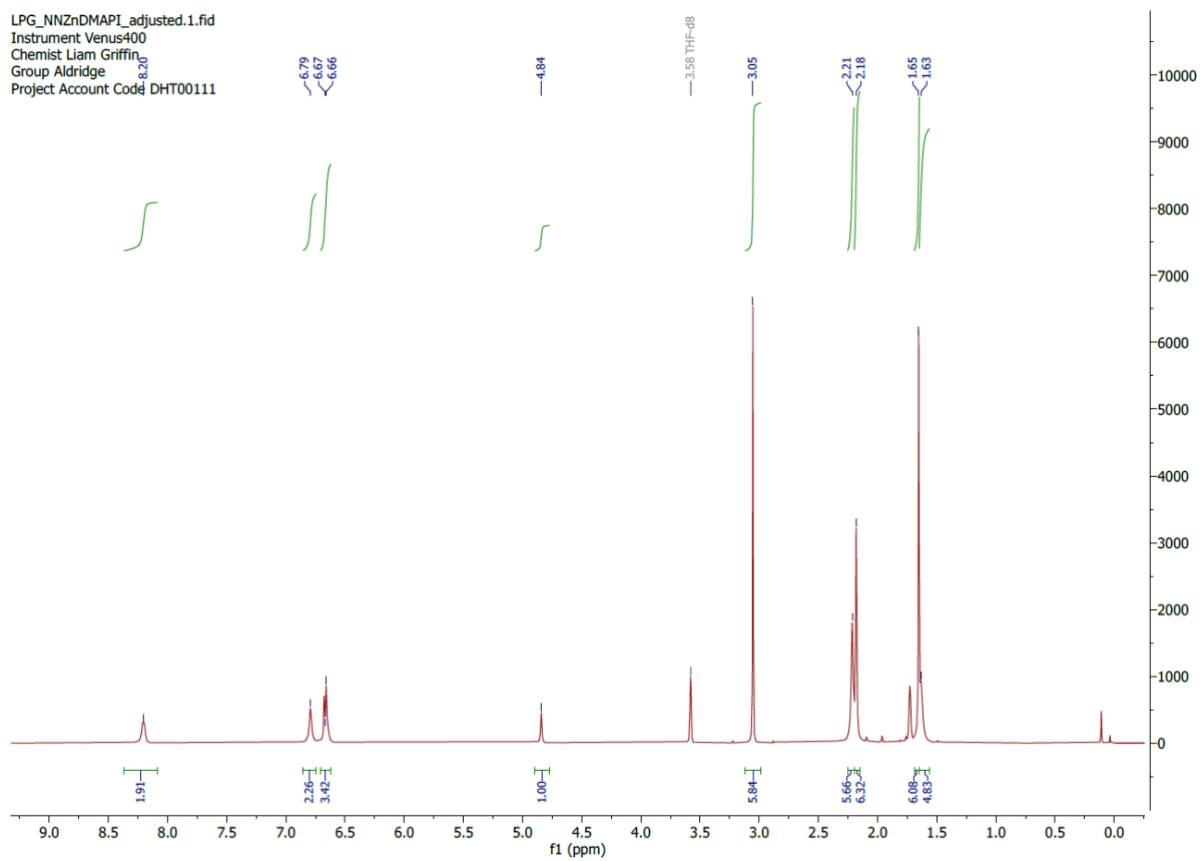

**Fig S8.** <sup>1</sup>H NMR spectrum of (Nacnac<sup>Mes</sup>)Zn(DMAP)I (3).

NMR/ZnDMAPI/LPG\_Data\_MesNNZnDMAPI/1/fid

LPG\_Data\_MesNNZnDMAPI.1.fid

Date: 2024-08-25T17:31:48

13C-NMR (100.64 MHz, THF, 512 scans)

Instrument Venus400

Chemist Liam Griffin

Group Aldridge

Project Account Code DHT00111

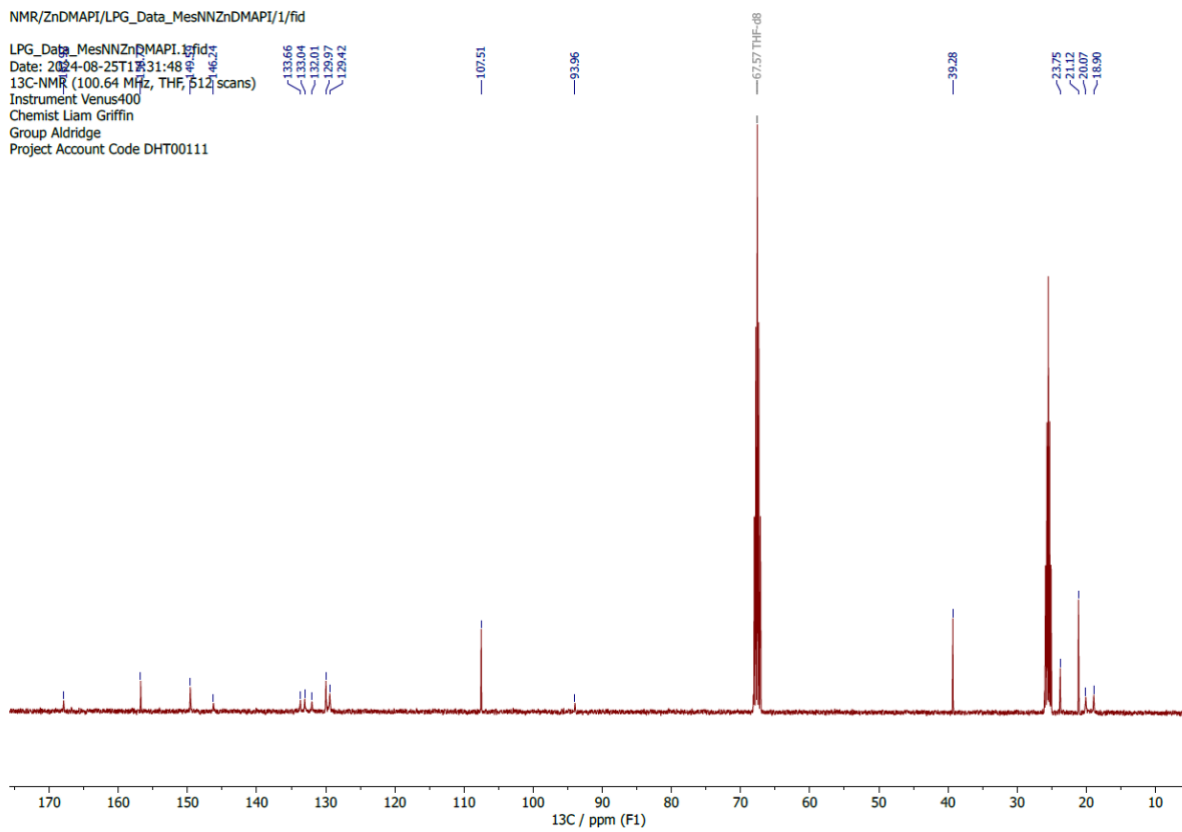

Fig S9.  $^{13}\text{C}$  NMR spectrum of  $(\text{Nacnac}^{\text{Mes}})\text{Zn}(\text{DMAP})\text{I}$  (3).



**$[(\text{Nacnac}^{\text{Mes}})\text{ZnOBpin}]_2$  (4)**

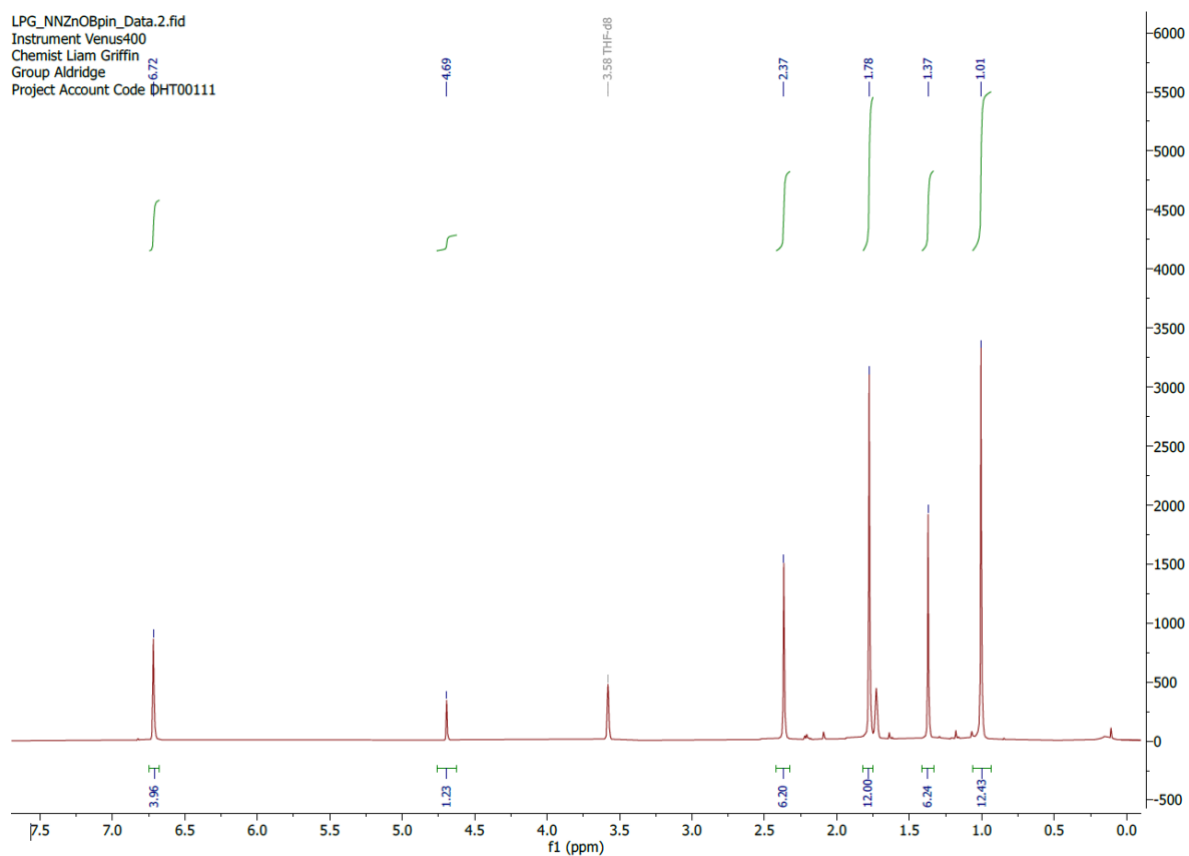

**Fig S10.**  $^1\text{H}$  NMR spectrum of  $[(\text{Nacnac}^{\text{Mes}})\text{ZnOBpin}]_2$  (4).

Desktop/NMR/LPG\_NNZnOBpin\_Data/5/fid

LPG\_NNZnOBpin\_Data.5.fid  
Date: 2024-08-24T19:56:43  
11B-NMR (128.40 MHz, THF, 1024 scans)  
Instrument Venus400  
Chemist Liam Griffin  
Group Aldridge  
Project Account Code DHT00111

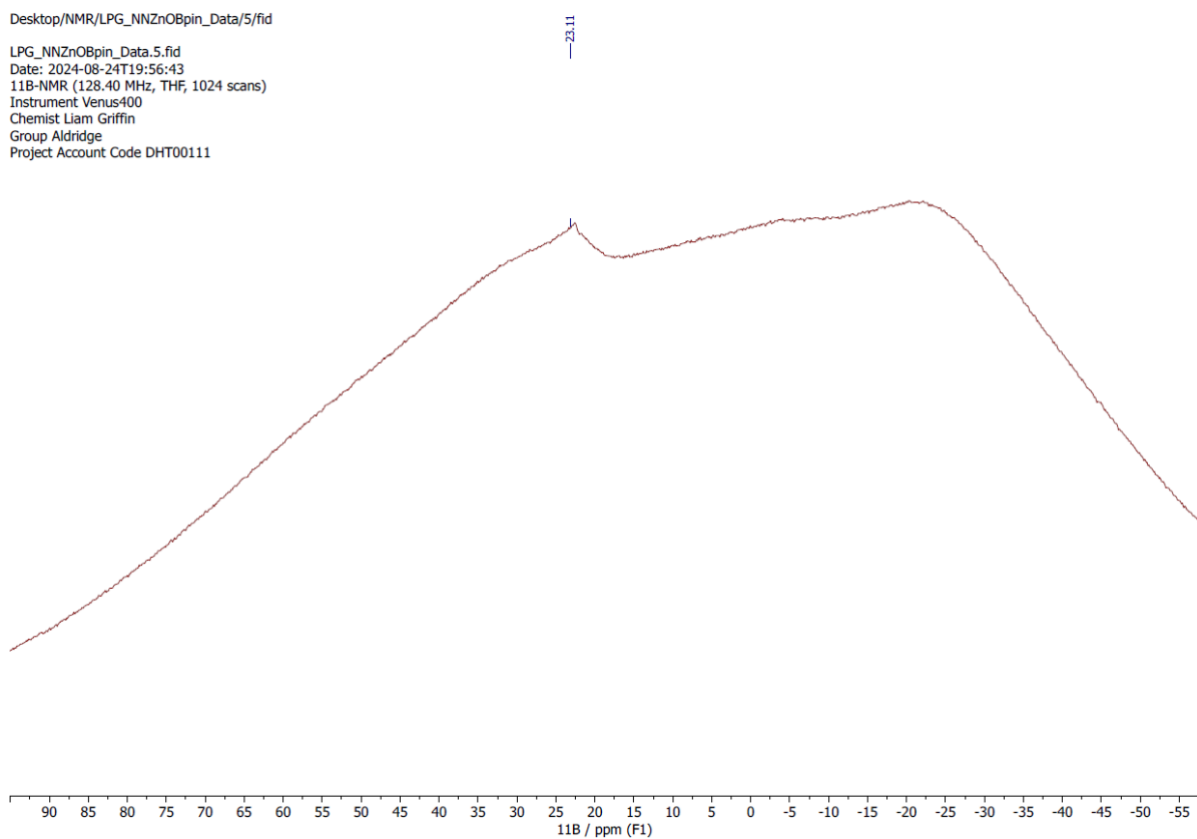

**Fig S11.**  $^{11}\text{B}$  NMR spectrum of  $[(\text{Nacnac}^{\text{Mes}})\text{ZnOBpin}]_2$  (**4**).

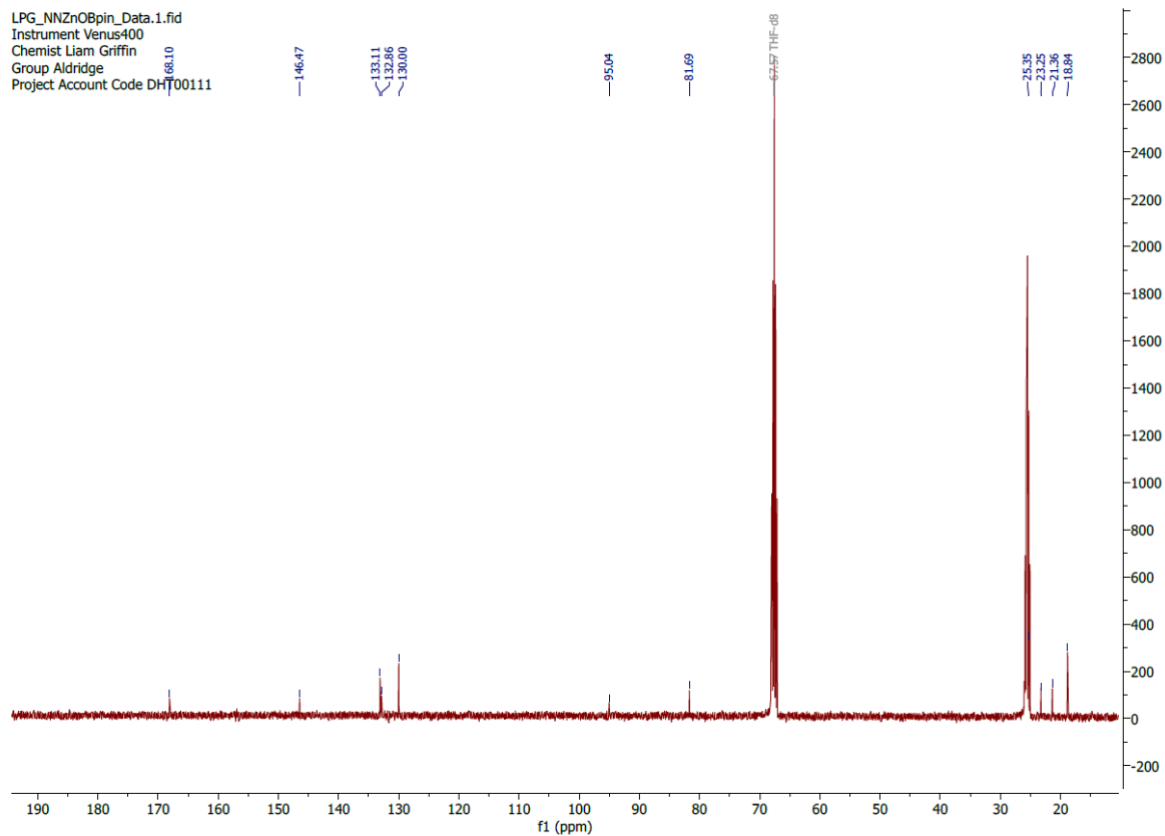

**Fig S12.**  $^{13}\text{C}$  NMR spectrum of  $[(\text{Nacnac}^{\text{Mes}})\text{ZnOBpin}]_2$  (**4**).

**(Nacnac<sup>Mes</sup>)ZnOB{(NDippCH)<sub>2</sub>} (5)**

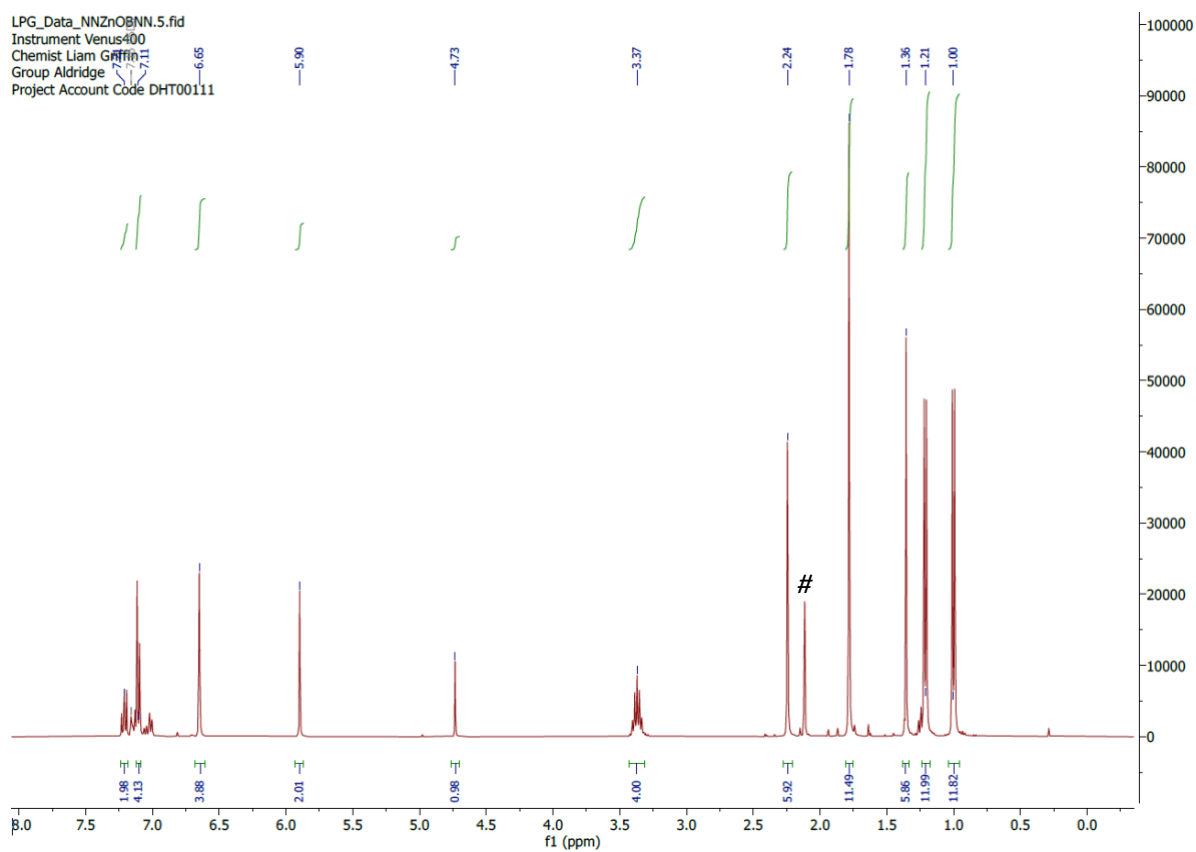

**Fig S13.** <sup>1</sup>H NMR spectrum of (Nacnac<sup>Mes</sup>)ZnOB{(NDippCH)<sub>2</sub>}. Residual toluene marked #.

LPG\_Data\_NNZnOBNN.6.fid  
Instrument Venus400  
Chemist Liam Griffin  
Group Aldridge  
Project Account Code DHT00111

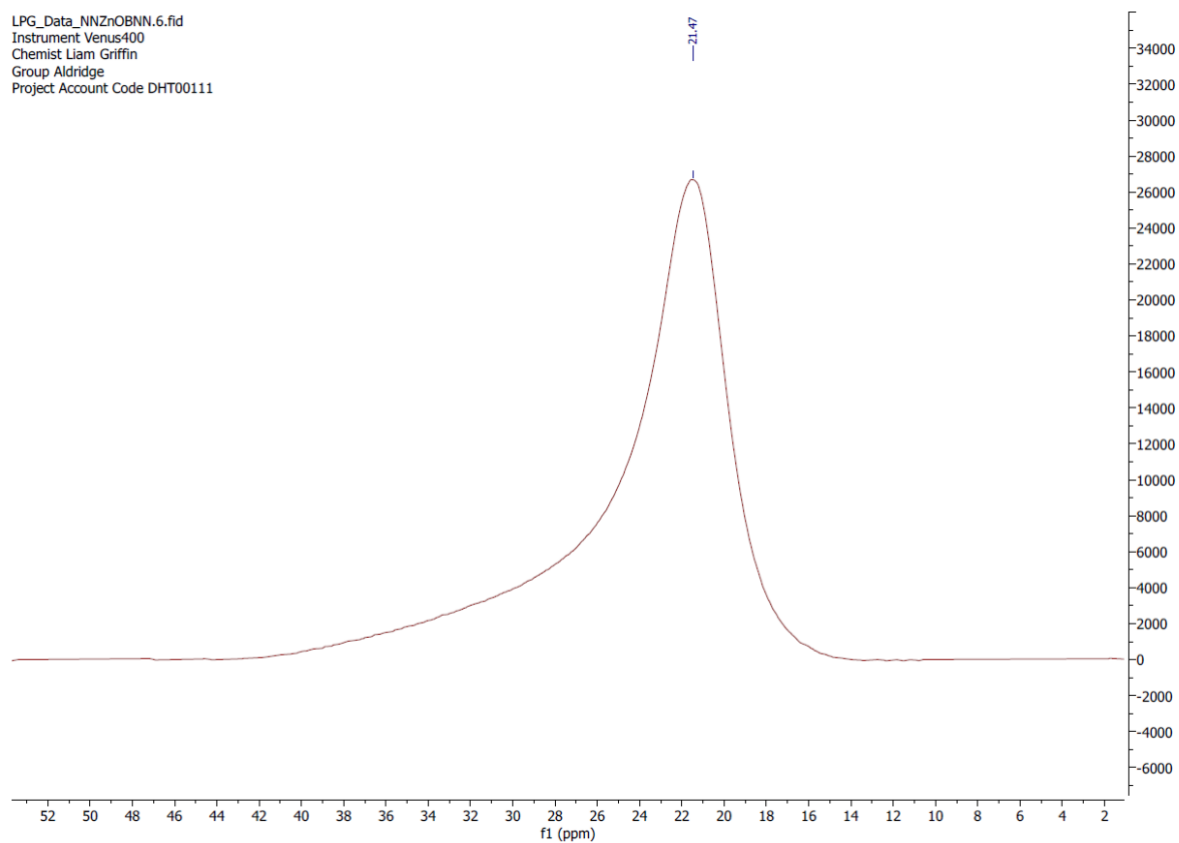

**Fig S14.**  $^{11}\text{B}$  NMR spectrum of  $(\text{Nacnac}^{\text{Mes}})\text{ZnOB}\{(\text{NDippCH})_2\}$ .

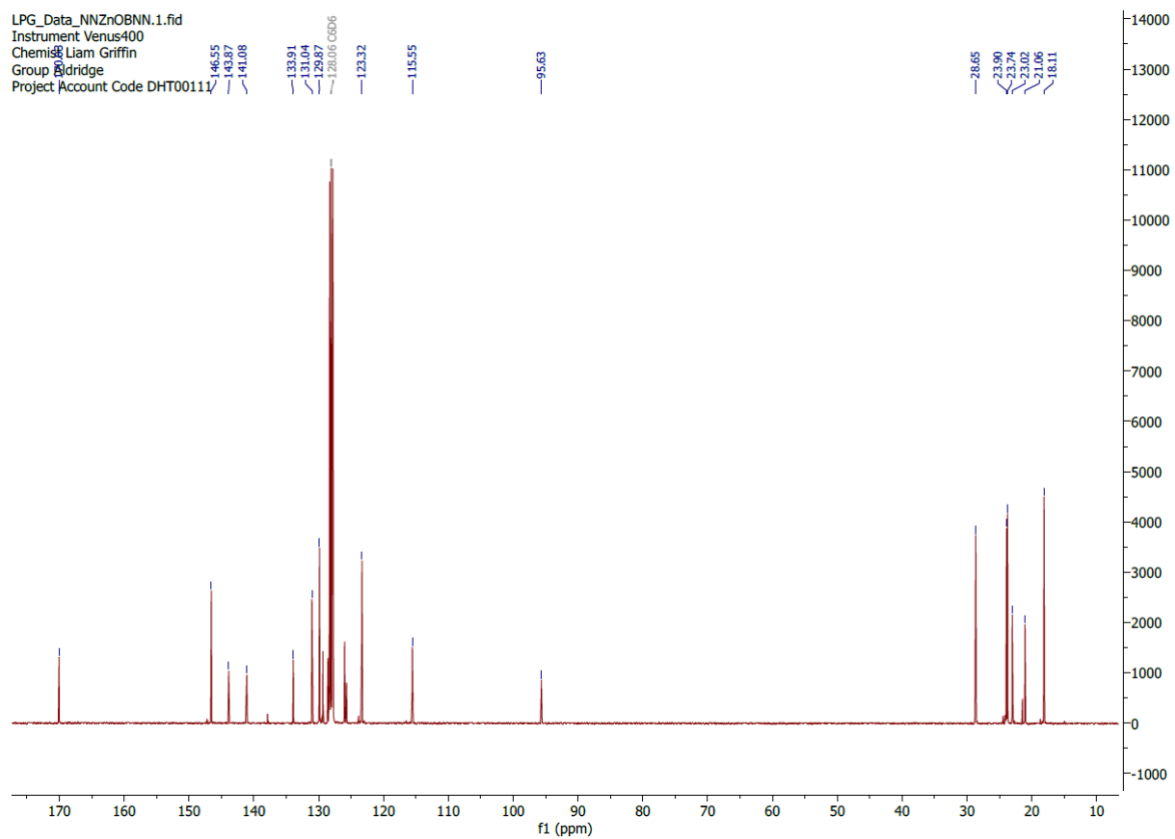

Fig S15.  $^{13}\text{C}$  NMR spectrum of  $(\text{Nacnac}^{\text{Mes}})\text{ZnOB}\{(\text{NDippCH})_2\}$ .

# $\{(\text{HCDippN})_2\}\text{BOBpin (6)}$

LPG\_ZnZn\_BOBPin\_InSitu.1.fid  
Instrument Venus400  
Chemist Liam Griffin  
Group Aldridge  
Project Account Code DHT00111

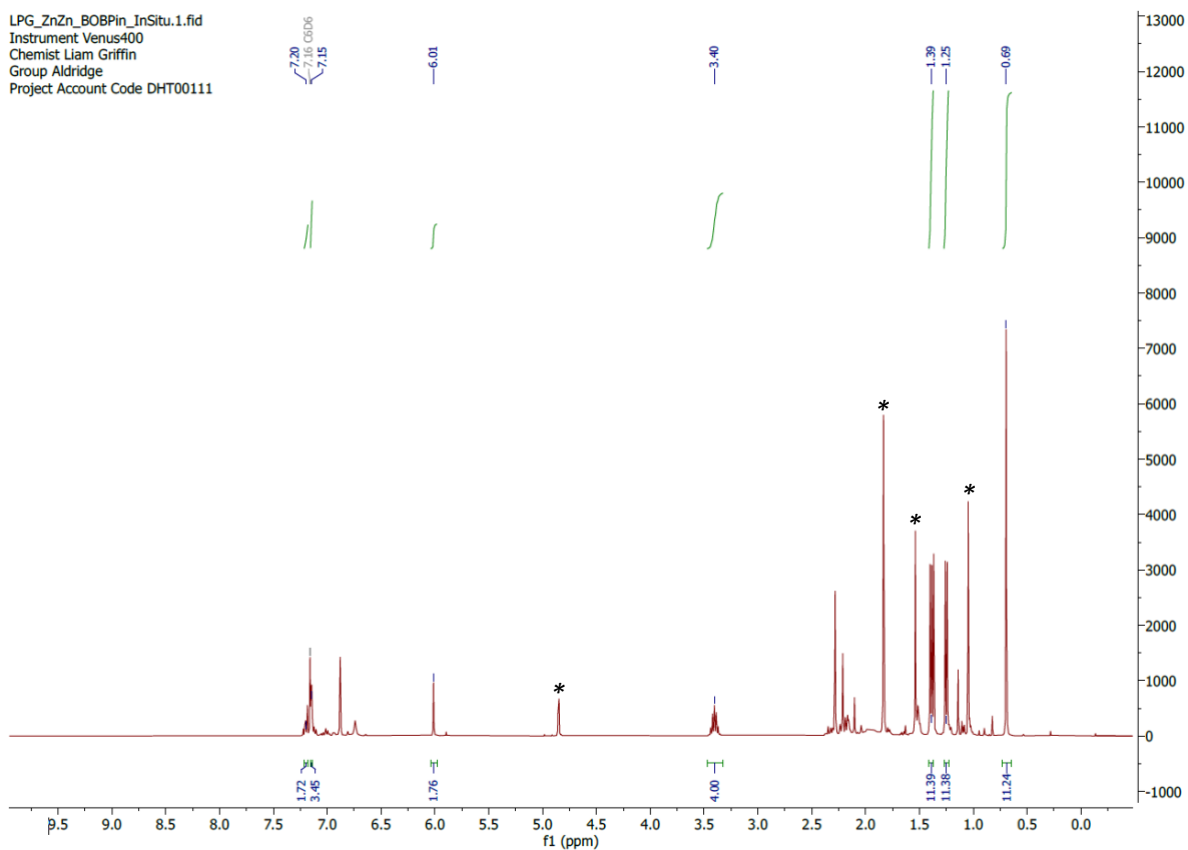

**Fig S16.** *In situ*  $^1\text{H}$  NMR spectrum of  $\{(\text{HCDippN})_2\}\text{BOBpin (6)}$ . Diagnostic signals of  $[(\text{Nacnac}^{\text{Mes}})\text{Zn}]_2$  are marked \*.

LPG\_ZnZn\_BOBPin\_InSitu.6.fid  
Instrument Venus400  
Chemist Liam Griffin  
Group Aldridge  
Project Account Code DHT00111

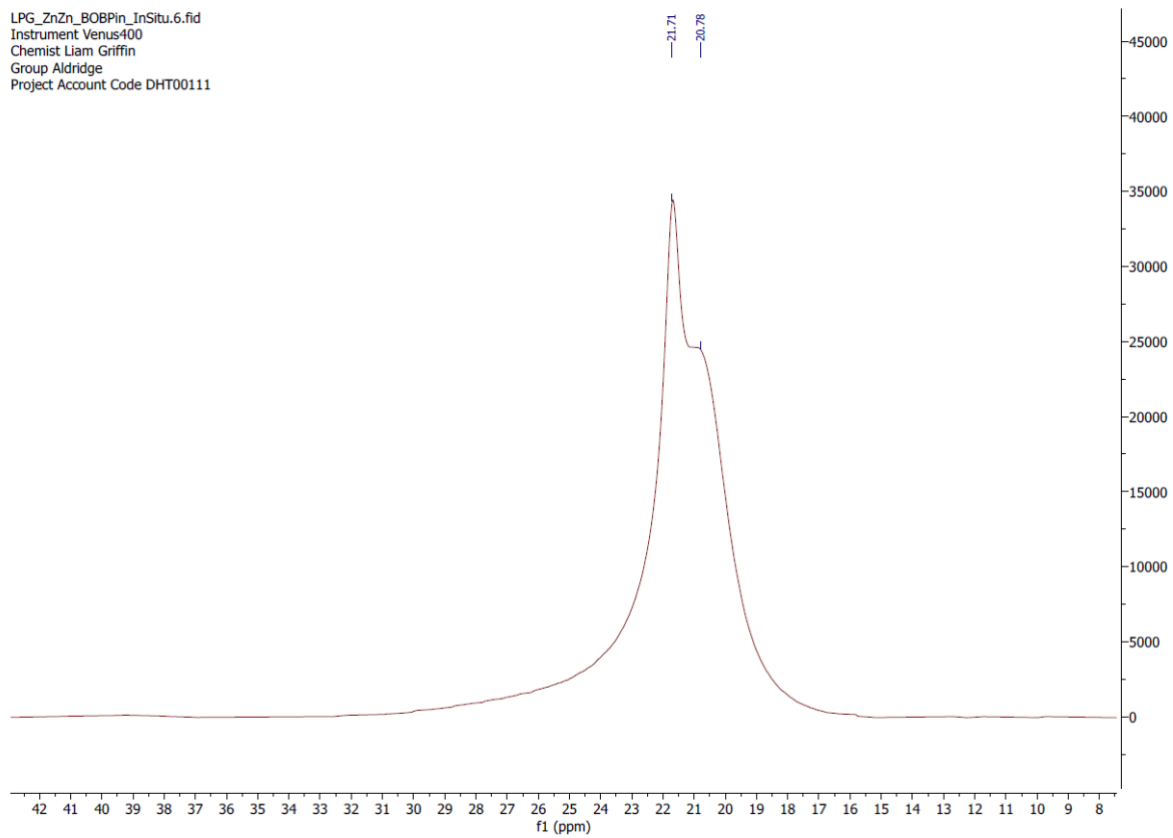

**Fig S17.** *In situ*  $^{11}\text{B}$  NMR spectrum of  $\{(\text{HCDippN})_2\}\text{BOBpin}$  (**6**).



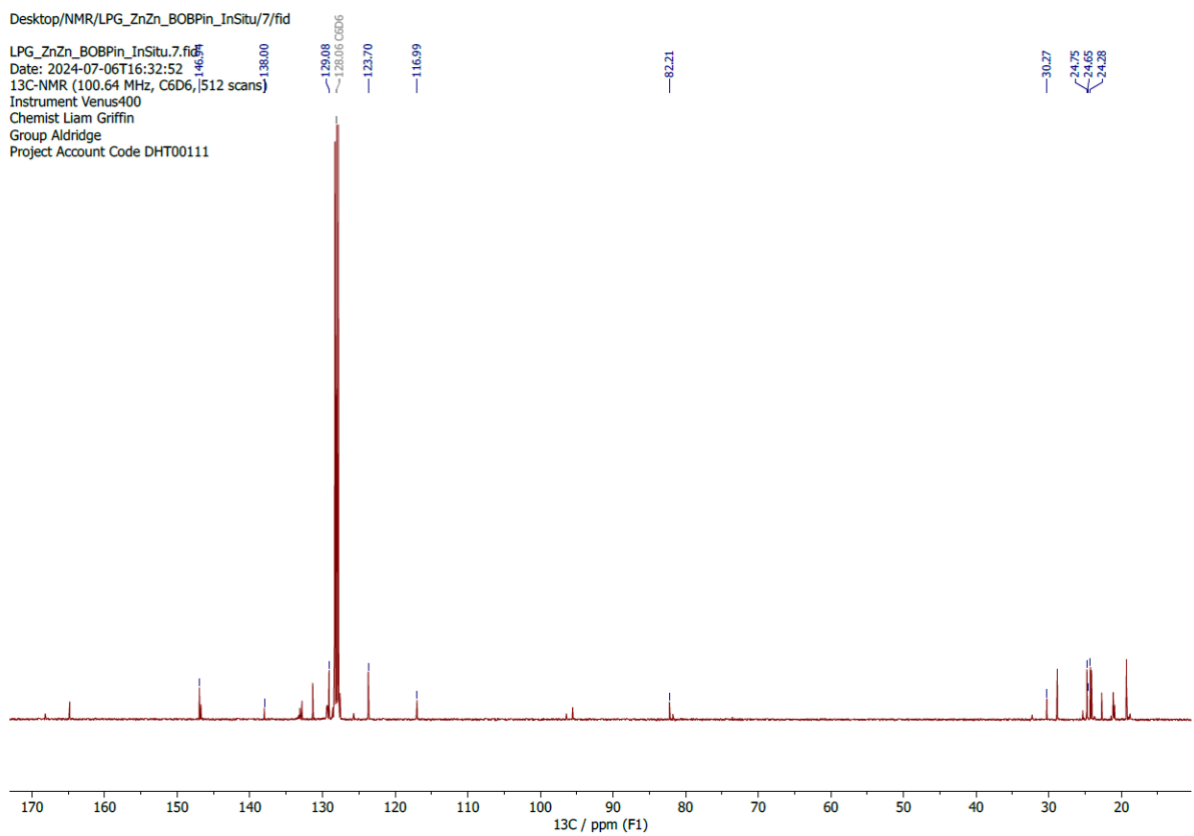

**Fig S18.** *In situ*  $^{13}\text{C}$  NMR spectrum of  $\{(\text{HCDippN})_2\}\text{BOBpin}$  (**6**), in the presence of  $[(\text{Nacnac}^{\text{Mes}})\text{Zn}]_2$ .

## 5. Computational details

Gas phase geometry optimizations and frequency analyses were carried out using the ORCA (5.0.4) software package,<sup>S11,S12</sup> using the R2-Scan-3C method.<sup>S13</sup> The optimized structures were confirmed to be minima on the potential energy surface by the absence of imaginary frequencies. Single point calculations were performed using the  $\omega$ B97X-D4 functional and Def2-TZVP basis set.<sup>S14-S16</sup> Natural bonding orbital (NBO) analyses were carried out using the NBO 7.0 program.<sup>S17,S18</sup> Atoms in molecules (AIM) analyses were conducted using Multiwfn software package.<sup>S19</sup> AIM bonding classifications have been made in accordance with the literature precedent.<sup>S20</sup> All iso-surfaces have been rendered at 0.05, unless otherwise stated.

**(Nacnac<sup>Mes</sup>)ZnBpin**

LUMO

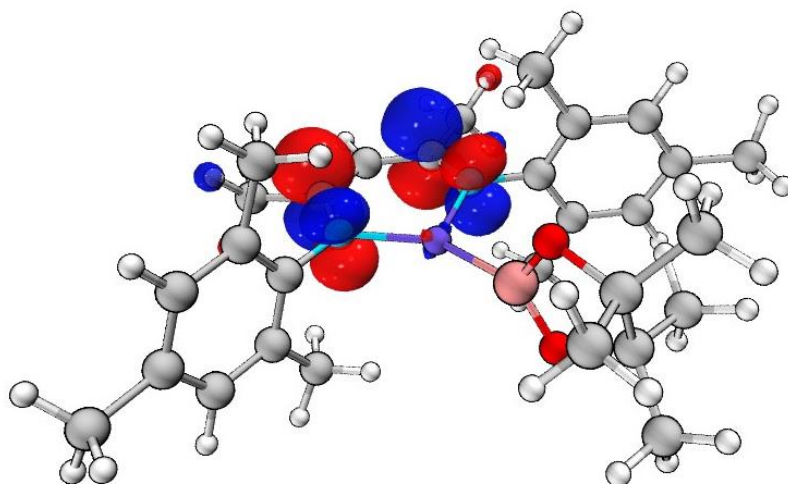

**Fig S19.** Ligand based LUMO of (Nacnac<sup>Mes</sup>)ZnBpin (**1**),  $E = 1.2292$  eV.

HOMO

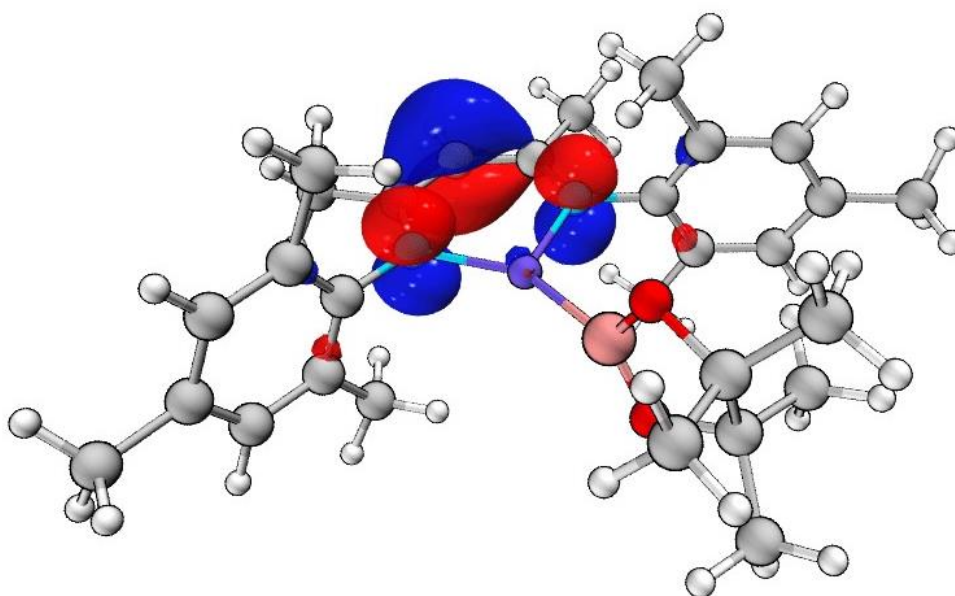

**Fig S20.** Ligand based HOMO of (Nacnac<sup>Mes</sup>)ZnBpin (**1**),  $E = -7.8818$  eV.

Zn-B bonding contributions

HOMO-2

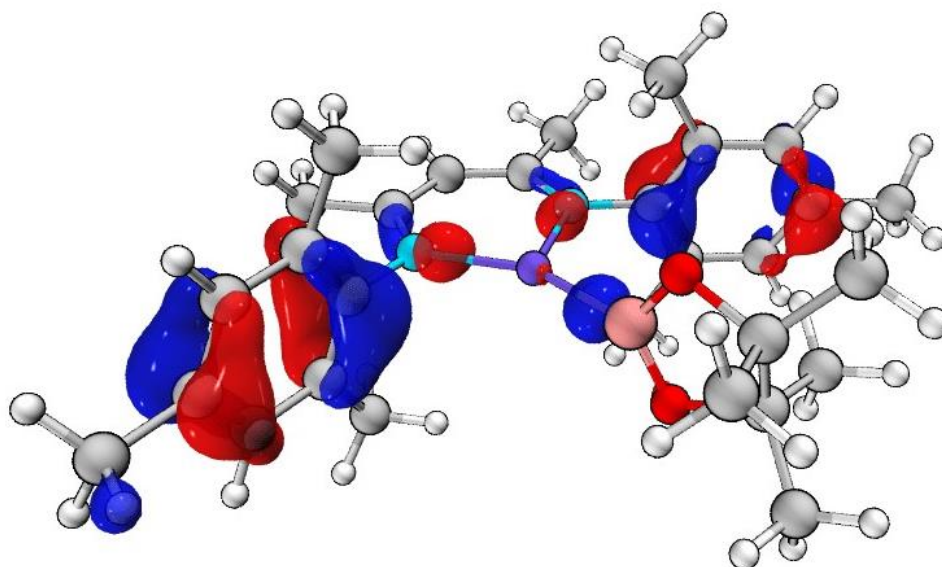

**Fig S21.** HOMO-2 of  $(Nacnac^{Mes})ZnBpin$  (**1**), featuring a small region of electron density between B and Zn,  $E = -8.6125$  eV.

HOMO-3

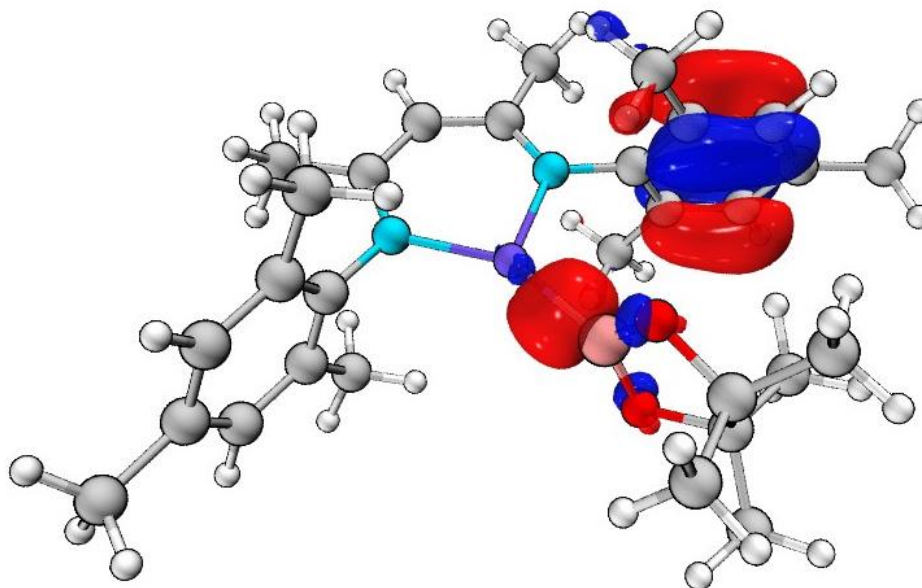

**Fig S22.** HOMO-3 of  $(Nacnac^{Mes})ZnBpin$  (**1**), featuring a significant region of electron density between B and Zn,  $E = -8.8903$  eV.

HOMO-4

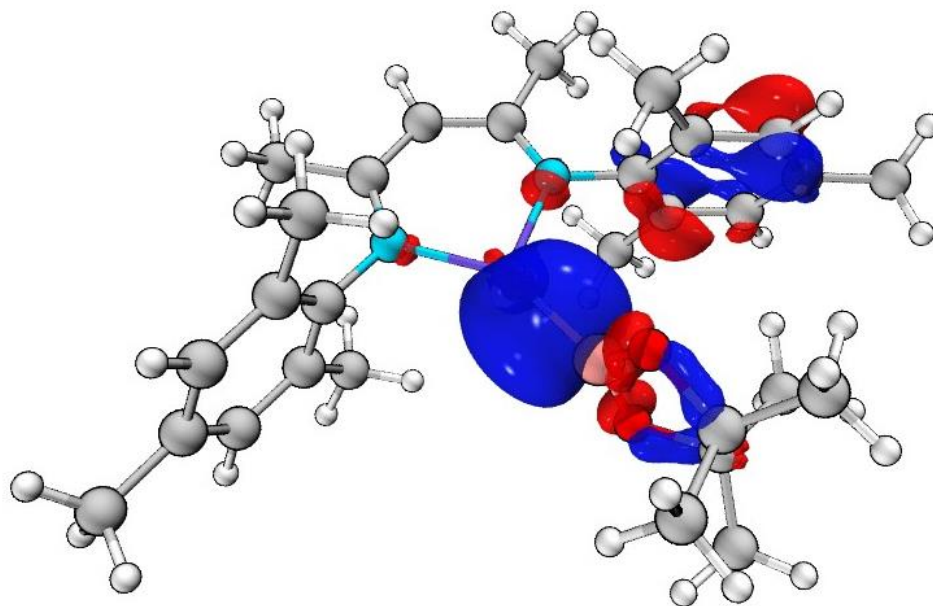

**Fig S23.** HOMO-4 of (Nacnac<sup>Mes</sup>)ZnBpin (**1**), featuring the most significant region of electron density between B and Zn,  $E = -8.9182$  eV.

### NBO analysis

One conventional NBO was located for the Zn-B interaction.

1.96172 electrons

21.75% (0.4664 electrons) Zn: s 96.5%, p 2.4%, d 1.1%

78.25% (0.8846 electrons) B: s 47.6%, p 52.4%

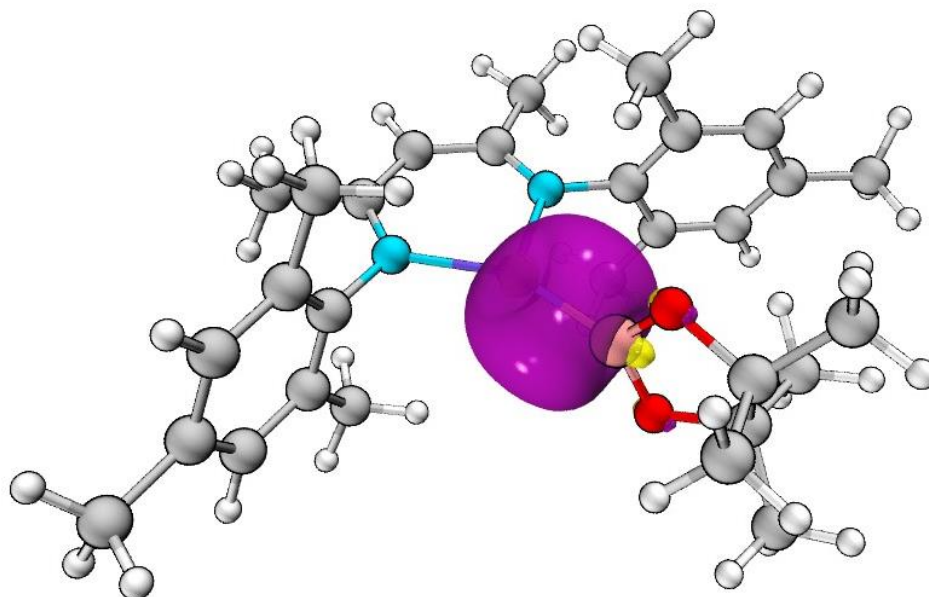

**Fig S24.** NBO corresponding to the Zn-B bonding interaction in  $(\text{Nacnac}^{\text{Mes}})\text{ZnBpin}$  (**1**).

WBI: 0.592

### NPA charges

Zn: 1.47012 e

B: 0.46825 e

### Bader charges

Zn: 0.879 e

B: 1.352 e

QTAIM

|                |                   |
|----------------|-------------------|
| $\rho$         | 0.1001319145E+00  |
| $\nabla^2\rho$ | 0.5864727743E-01  |
| $G(r)$         | 0.5672856343E-01  |
| $K(r)$         | 0.4206674407E-01  |
| $V(r)$         | -0.9879530750E-01 |
| $E(r)$         | -0.4206674407E-01 |
| ELF            | 0.5441836390E+00  |
| $\epsilon$     | 0.084374          |

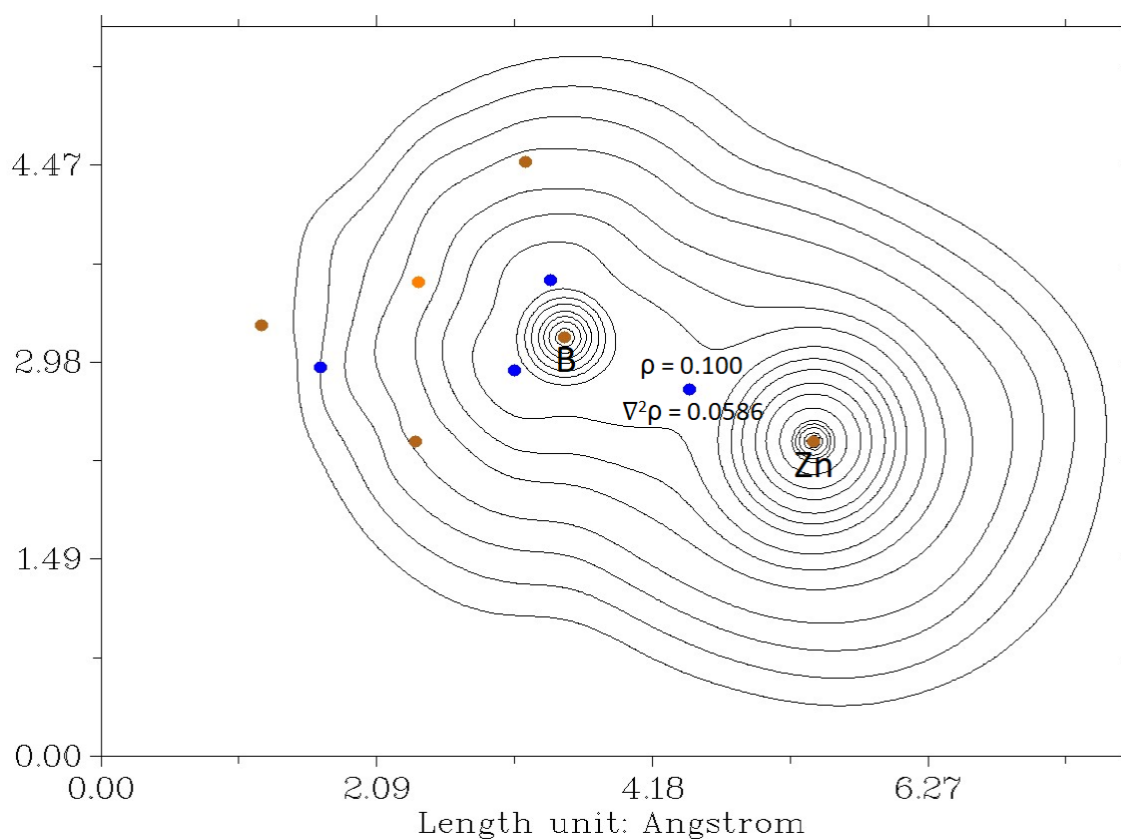

**Fig S25.** Contour plot of electron density in the region around the Zn-B bond in  $(Nacnac^{Mes})ZnBpin$  (**1**).

**(Nacnac<sup>Mes</sup>)Zn(DMAP)Bpin (2)**

LUMO

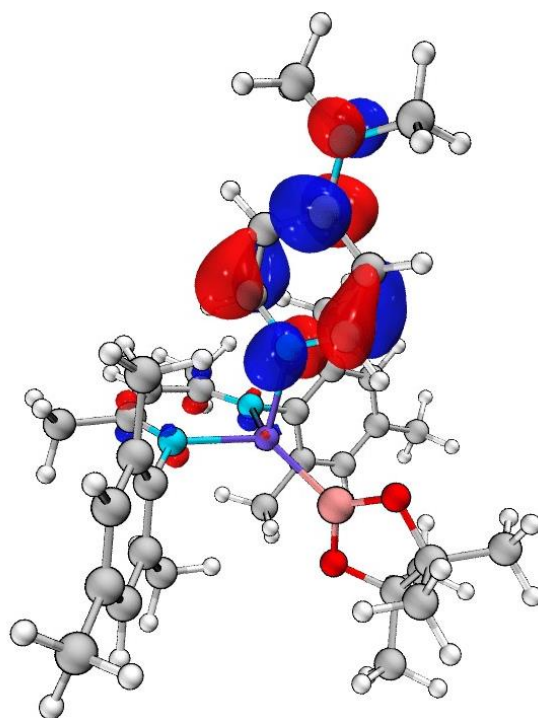

**Fig S26.** DMAP-based LUMO of (Nacnac<sup>Mes</sup>)Zn(DMAP)Bpin (**2**),  $E = 1.3777$  eV

HOMO

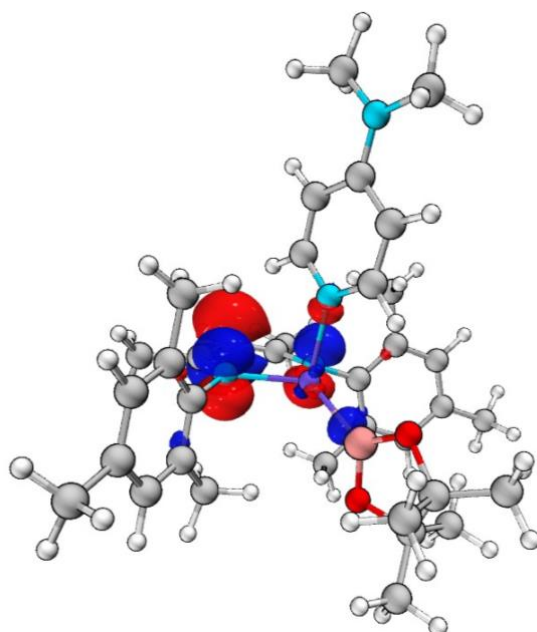

**Fig S27.** Primarily ligand-based HOMO of (Nacnac<sup>Mes</sup>)Zn(DMAP)Bpin (**2**), with a small amount of electron density between B and Zn,  $E = -7.1873$  eV.



Zn-B bonding contributions

HOMO-2

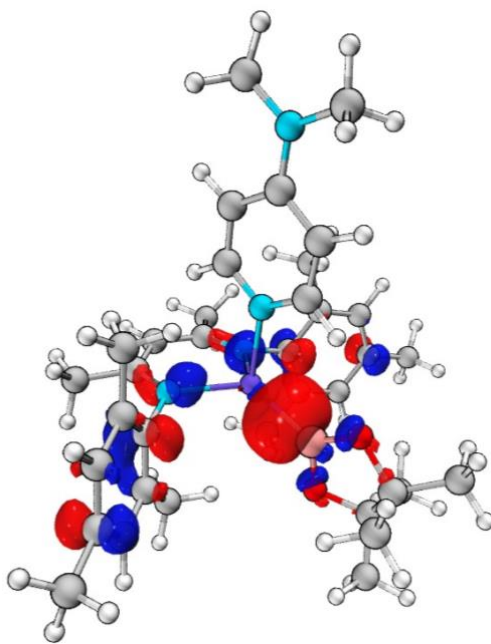

**Fig S28.** HOMO-2 of  $(Nacnac^{Mes})Zn(DMAP)Bpin$  (**2**), featuring a significant contribution to Zn-B  $\sigma$ -bonding,  $E = -8.1452$  eV.

HOMO-3

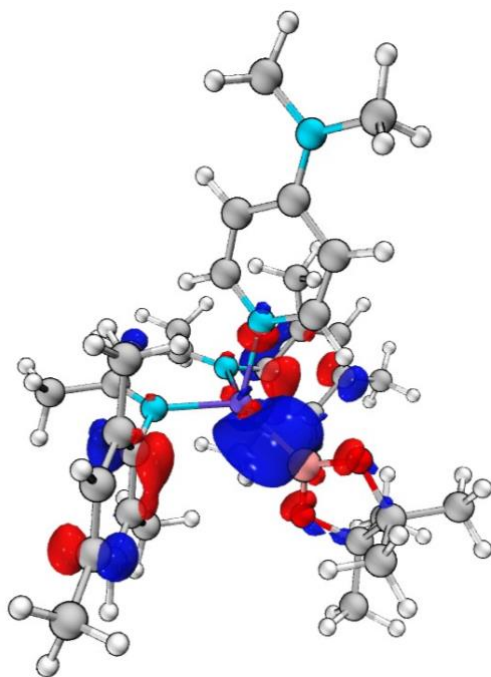

**Fig S29.** HOMO-3 of  $(Nacnac^{Mes})Zn(DMAP)Bpin$  (**2**), featuring a significant contribution to Zn-B  $\sigma$ -bonding,  $E = -8.2358$  eV.

### NBO analysis

No NBO was located for the Zn-B bonding interaction. This is instead described as a second-order perturbation interaction between a B-based lone pair and a Zn based vacant orbital, with an overall stabilization energy of 232.81 kcal/mol.

B-based lone pair – 1.64650 electrons: s 49.3%, p 50.67%

Zn vacant orbital – 0.44130 electrons: s 98.7%, p 1.0%, d 0.3%

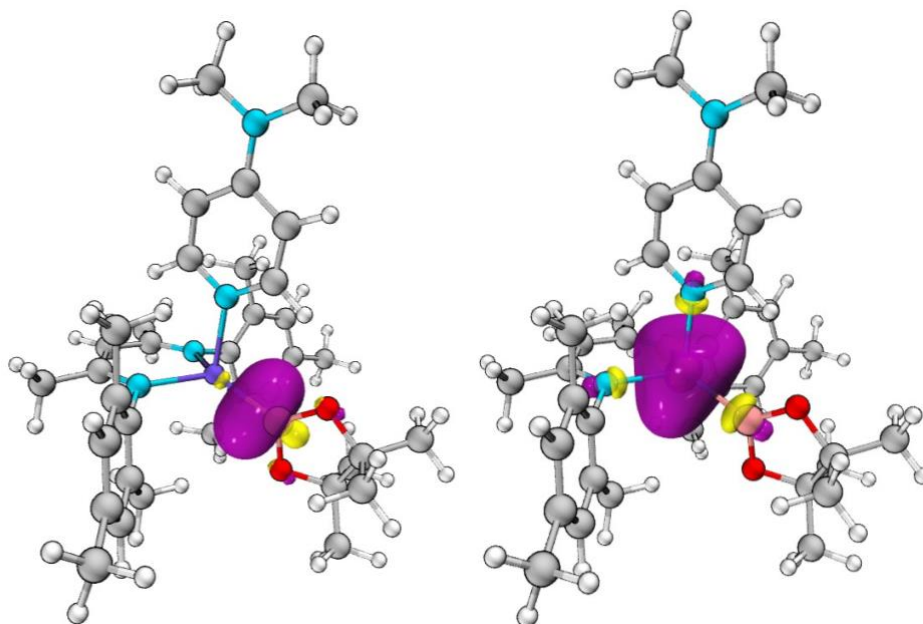

**Fig S30.** NBO orbitals for  $(Nacnac^{Mes})Zn(DMAP)Bpin$  (**2**) calculated to interact by Second Order Perturbation Theory, leading to a Zn-B  $\sigma$ -bonding interaction. Left, B-based lone pair, Right, Zn-based vacant orbital.

WBI: 0.496

### NPA charges

Zn: 1.56613 e

B: 0.41854 e

### Bader charges

Zn: 0.975 e

B: 1.272 e

QTAIM

|                |                   |
|----------------|-------------------|
| $\rho$         | 0.9544211041E-01  |
| $\nabla^2\rho$ | 0.9014936624E-01  |
| $G(r)$         | 0.6015711525E-01  |
| $K(r)$         | 0.3761977370E-01  |
| $V(r)$         | -0.9777688895E-01 |
| $E(r)$         | -0.3761977370E-01 |
| ELF            | 0.4750102996E+00  |
| $\epsilon$     | 0.058560          |

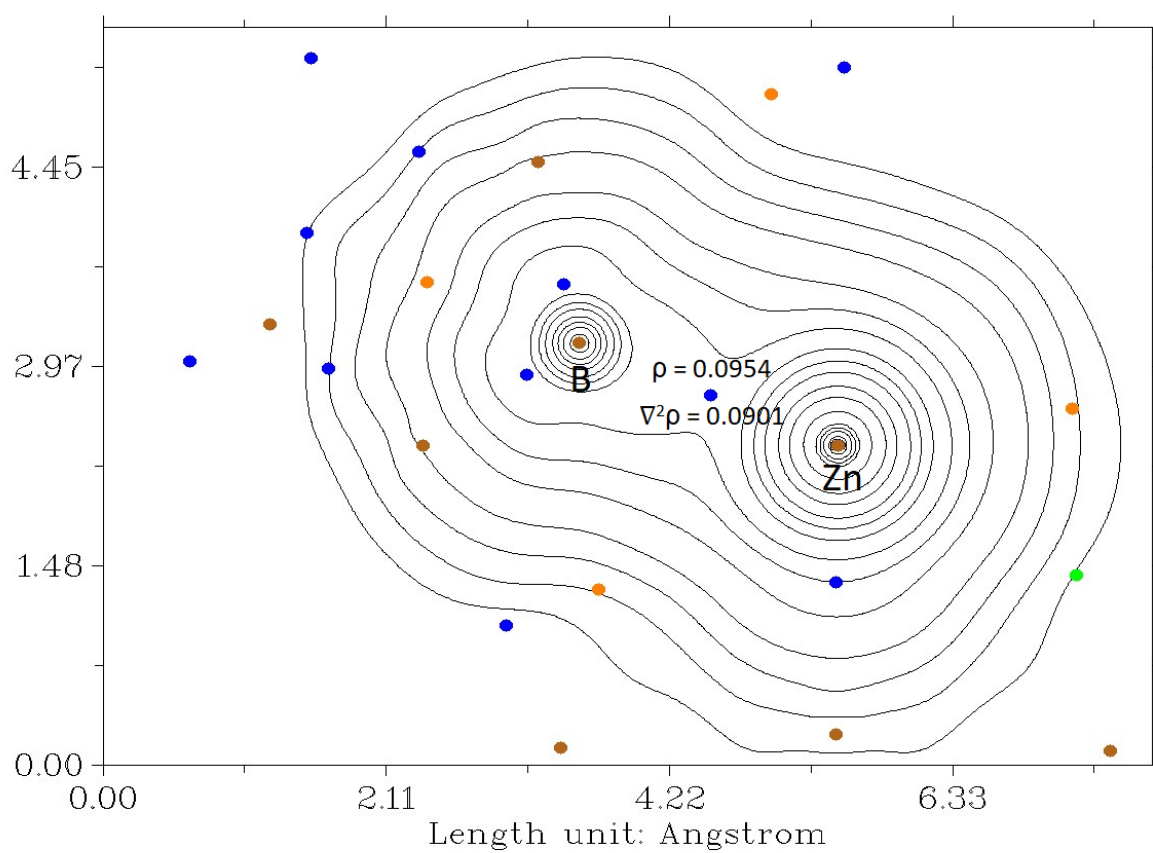

**Fig S31.** Contour plot of electron density in the region around the Zn-B bond in *(Nacnac<sup>Mes</sup>)Zn(DMAP)Bpin (2)*.

**Table S2.** Key QTAIM parameters (in a.u.) relating to the BCPs of the Zn-B bonding interactions for zinc-boryl species **1** and **2**.

|                | <i>(Nacnac<sup>Mes</sup>)ZnBpin (1)</i> | <i>(Nacnac<sup>Mes</sup>)Zn(DMAP)Bpin (2)</i> |
|----------------|-----------------------------------------|-----------------------------------------------|
| $\rho$         | 0.1001                                  | 0.09544                                       |
| $\nabla^2\rho$ | 0.05865                                 | 0.09015                                       |

## 7. Optimised XYZ coordinates

| <b>Nacnac<sup>Mes</sup>ZnBpin (1): -3195.348038663298 E<sub>h</sub></b> |                   |                   |                   |
|-------------------------------------------------------------------------|-------------------|-------------------|-------------------|
| Zn                                                                      | -1.00569597992652 | 8.36829931809950  | 15.63429840251350 |
| O                                                                       | 0.23312213009687  | 8.82138844931929  | 12.91695432176124 |
| O                                                                       | 0.52007541007981  | 6.66428836442517  | 13.61985128564829 |
| N                                                                       | -1.00132060882704 | 8.98680513854936  | 17.48706083474262 |
| N                                                                       | -2.98397560074018 | 8.17560082294936  | 15.52626010096209 |
| C                                                                       | -3.82584362761764 | 8.48661489253424  | 16.50201497363231 |
| C                                                                       | 0.27947824933209  | 9.24194269732946  | 18.05966785395151 |
| C                                                                       | -3.46404433021647 | 7.68090421113294  | 14.28142371969911 |
| C                                                                       | -2.09955684484563 | 9.18168116580471  | 18.21976143433770 |
| C                                                                       | 0.86515508562621  | 10.50775852417875 | 17.91062008689743 |
| C                                                                       | -3.40577565560078 | 8.95756409529206  | 17.75964034207281 |
| H                                                                       | -4.19559568496607 | 9.17288776875349  | 18.46873064547313 |
| C                                                                       | 0.96903761986552  | 8.20356947631389  | 18.70082616086399 |
| C                                                                       | -5.31030102528431 | 8.34069367031991  | 16.26740517725800 |
| H                                                                       | -5.62208463098462 | 8.94142523664205  | 15.40560004437338 |
| H                                                                       | -5.88284359683960 | 8.65155586413264  | 17.14269733518252 |
| H                                                                       | -5.56550887310249 | 7.30293616430865  | 16.02633832431562 |
| C                                                                       | 0.98883870833172  | 8.15462424257073  | 11.85552865940697 |
| C                                                                       | -3.64647705186926 | 8.56705293370207  | 13.20887074662354 |
| C                                                                       | 2.12870611863673  | 10.72821612053757 | 18.45538848032458 |
| H                                                                       | 2.58266030170770  | 11.71221954637801 | 18.35024483314607 |
| C                                                                       | 2.82588523452401  | 9.72211164650550  | 19.12392416834940 |
| C                                                                       | -3.35937440624044 | 10.03143294109755 | 13.38047222482478 |
| H                                                                       | -2.28290962635983 | 10.18931165992444 | 13.53062775621891 |
| H                                                                       | -3.86960279493573 | 10.45249679558921 | 14.25332004757756 |
| H                                                                       | -3.66177085846881 | 10.59461133397619 | 12.49374523406720 |
| C                                                                       | 2.23170623746087  | 8.46600218474290  | 19.23138906501148 |
| H                                                                       | 2.76606100526013  | 7.66423628153838  | 19.73788484041198 |
| C                                                                       | -3.63946841053333 | 6.29994085257612  | 14.10533858610848 |
| C                                                                       | 4.20210410669543  | 9.97759265939289  | 19.67750303863014 |
| H                                                                       | 4.96499938477502  | 9.86933477596887  | 18.89661662063115 |
| H                                                                       | 4.44673722145007  | 9.27179505412282  | 20.47645313837126 |
| H                                                                       | 4.28795363921820  | 10.99223159360665 | 20.07871758419871 |
| C                                                                       | -1.94189946723816 | 9.67975989421774  | 19.63715538683082 |
| H                                                                       | -1.33342618185558 | 8.98590239961452  | 20.22745636879637 |
| H                                                                       | -2.91203616060652 | 9.79933243346003  | 20.12135277569335 |
| H                                                                       | -1.41468466011727 | 10.63992671532522 | 19.65507029765383 |
| C                                                                       | 0.73778903605291  | 6.64510792256562  | 12.17264868152541 |
| C                                                                       | 0.14709628785161  | 11.59027223124144 | 17.15500716485876 |
| H                                                                       | 0.71435088699354  | 12.52422152384613 | 17.17935720872944 |
| H                                                                       | -0.85367516445567 | 11.78192751575098 | 17.55761340447506 |
| H                                                                       | 0.00837957513403  | 11.30265187491263 | 16.10435787225475 |
| C                                                                       | 0.36244534525873  | 6.83121960931995  | 18.78743644526742 |
| H                                                                       | 1.00078531357699  | 6.15846248631201  | 19.36579675140064 |
| H                                                                       | 0.23327981850129  | 6.40125201527618  | 17.78547917198924 |

|                                                                                              |                   |                   |                   |
|----------------------------------------------------------------------------------------------|-------------------|-------------------|-------------------|
| H                                                                                            | -0.63186491435181 | 6.84660215836907  | 19.24738622244431 |
| C                                                                                            | -4.06062734999684 | 8.05480853953977  | 11.97976339516872 |
| H                                                                                            | -4.21032914424376 | 8.74183593281979  | 11.14847199228339 |
| C                                                                                            | -3.32804713498226 | 5.34782570386731  | 15.22523578652070 |
| H                                                                                            | -3.59362019477010 | 4.32362007682671  | 14.95098716579851 |
| H                                                                                            | -3.85143537262757 | 5.60608696496562  | 16.15209415423432 |
| H                                                                                            | -2.25462285626204 | 5.37161412988234  | 15.45576953485031 |
| B                                                                                            | 0.07304448756951  | 7.92702078893298  | 13.95840084221468 |
| C                                                                                            | -4.05920697301049 | 5.83025511932885  | 12.86182836852453 |
| H                                                                                            | -4.20118919368124 | 4.75946534422299  | 12.72531708326651 |
| C                                                                                            | 2.44717334875777  | 8.57193069660631  | 12.02548239821174 |
| H                                                                                            | 2.50886617339186  | 9.66350991338173  | 11.98765709434612 |
| H                                                                                            | 3.07651032636746  | 8.16148502024486  | 11.22885191362045 |
| H                                                                                            | 2.83878400900518  | 8.24260417030653  | 12.99255647722442 |
| C                                                                                            | 0.45080207650664  | 8.62408617740779  | 10.51437488118228 |
| H                                                                                            | -0.63061134178426 | 8.48404400542419  | 10.44969500250764 |
| H                                                                                            | 0.92828452643038  | 8.07644501509085  | 9.69388056646429  |
| H                                                                                            | 0.66704568073475  | 9.68894959713337  | 10.38562408499210 |
| C                                                                                            | -4.27870160251624 | 6.69111208084301  | 11.78765328700445 |
| C                                                                                            | 1.90288007569518  | 5.72087170226832  | 11.86398665901859 |
| H                                                                                            | 2.79574565993803  | 5.99527596060713  | 12.42946067267719 |
| H                                                                                            | 2.14065537036363  | 5.74717890579368  | 10.79440644423122 |
| H                                                                                            | 1.63379180553312  | 4.69358449202173  | 12.12732160136328 |
| C                                                                                            | -4.68118532347664 | 6.15632897055789  | 10.43970265670045 |
| H                                                                                            | -5.28049991822012 | 6.88387713391947  | 9.88410960345592  |
| H                                                                                            | -5.26214419480631 | 5.23405474856243  | 10.53358303092309 |
| H                                                                                            | -3.79661350826854 | 5.92678277334761  | 9.83177579487694  |
| C                                                                                            | -0.55189104368806 | 6.10996662259340  | 11.55342687561135 |
| H                                                                                            | -0.77000315874329 | 5.13040721296623  | 11.98944954521262 |
| H                                                                                            | -0.45902216422676 | 5.99436058083086  | 10.46809608281842 |
| H                                                                                            | -1.39884362541463 | 6.76814635717840  | 11.77174318518715 |
| <b>Nacnac<sup>Mes</sup>ZnOB{(NDippCH)<sub>2</sub>} (5): -4007.029880121355 E<sub>h</sub></b> |                   |                   |                   |
| Zn                                                                                           | 1.77209368059339  | 8.07311725809021  | 15.09667972475072 |
| O                                                                                            | 1.36650550644669  | 8.30270856516209  | 13.34274955456828 |
| N                                                                                            | 3.61564948723860  | 7.80273374126823  | 15.68911459300305 |
| N                                                                                            | 0.82016550544546  | 7.62751184508411  | 16.71614580906611 |
| N                                                                                            | -0.01990301896639 | 10.00950916287920 | 12.06662725842504 |
| N                                                                                            | 1.28556264005621  | 8.56357797229134  | 10.86541686442202 |
| C                                                                                            | 4.69001897398264  | 7.94824184130176  | 14.75962943057442 |
| C                                                                                            | 5.51515992922284  | 9.08146830864706  | 14.80962973594603 |
| C                                                                                            | 1.49197808428461  | 7.26148499284366  | 17.81424249839451 |
| C                                                                                            | 3.86720329345713  | 7.31729339118173  | 16.90203945706116 |
| C                                                                                            | -0.75423942721806 | 10.73291543767099 | 13.04317901783591 |
| C                                                                                            | 4.87702005432260  | 6.96195722069282  | 13.78052830224434 |
| C                                                                                            | -0.60775639293589 | 7.59650064149891  | 16.75924920628608 |
| C                                                                                            | -1.31662306328746 | 8.76434727189238  | 17.06268246041562 |
| C                                                                                            | 2.88504888430707  | 7.12585638269352  | 17.89098868138104 |
| H                                                                                            | 3.25806796598992  | 6.77854170036045  | 18.84623406512002 |
| C                                                                                            | 5.27650494980375  | 10.16843909914266 | 15.82106079840106 |

|   |                   |                   |                   |
|---|-------------------|-------------------|-------------------|
| H | 4.21590483169879  | 10.43242473453470 | 15.87629222814001 |
| H | 5.84341412043759  | 11.06637740538387 | 15.56152537920866 |
| H | 5.57546894438557  | 9.86926717318692  | 16.83337432328468 |
| C | 5.27588502102586  | 6.89636462914789  | 17.24649101398751 |
| H | 5.61864914838416  | 6.13456862342055  | 16.53693268794416 |
| H | 5.32587052360669  | 6.48687568061776  | 18.25613988782268 |
| H | 5.98161612315752  | 7.72803808877052  | 17.16611072164149 |
| C | 2.29151579363558  | 7.65811094634765  | 10.43600795097646 |
| C | -0.17718080761309 | 10.26287161711502 | 10.69307882349267 |
| H | -0.85340264636654 | 11.02568815488026 | 10.33288573811368 |
| C | 6.56415583701451  | 9.17908738598511  | 13.89575646710691 |
| H | 7.20950758896698  | 10.05546846987835 | 13.92959258210126 |
| C | 3.49843947740264  | 8.16478680932075  | 9.91307957864631  |
| C | 0.70658060124963  | 6.94157968977419  | 19.06426566996504 |
| H | 0.03210283138662  | 7.76541473393862  | 19.32000090069417 |
| H | 1.37416118575120  | 6.75124450935122  | 19.90539317958655 |
| H | 0.07084678611829  | 6.06224280902954  | 18.91346272296993 |
| C | -1.27642164579708 | 6.39303405089054  | 16.49051387007683 |
| C | 5.93346353455527  | 7.10348130989805  | 12.88349808327244 |
| H | 6.07281696913556  | 6.34488105711096  | 12.11637564007251 |
| C | 0.59951931996091  | 9.41227955653025  | 9.98611466011858  |
| H | 0.70158521255100  | 9.32527091685278  | 8.91296570042303  |
| C | -2.70762730190231 | 8.69571976780864  | 17.14692785334080 |
| H | -3.26300462928344 | 9.60051601636510  | 17.38593804280635 |
| C | -2.06669445263916 | 10.32629303560555 | 13.34900076951729 |
| C | 2.06752092917377  | 6.27362908696819  | 10.56005518981009 |
| C | -0.17101215306035 | 11.85672528392986 | 13.65501504406458 |
| C | 3.75842387316118  | 9.66213232464734  | 9.89215800083883  |
| H | 2.82292856466026  | 10.16357735571861 | 9.61935519843585  |
| C | 3.06827190875428  | 5.40226055061084  | 10.12684888215428 |
| H | 2.92135878775355  | 4.32972010101117  | 10.20629880076456 |
| C | 3.95411314278257  | 5.77963910863267  | 13.70312713367153 |
| H | 3.86781746173416  | 5.26243521050568  | 14.66598400376226 |
| H | 4.30083703607981  | 5.06838518580404  | 12.94972043267317 |
| H | 2.94659216317115  | 6.10110648663425  | 13.40680225446494 |
| C | -3.39775732249191 | 7.50466703483411  | 16.93189330053000 |
| C | 4.46581936594266  | 7.25439971531786  | 9.48571263460324  |
| H | 5.40336381642570  | 7.61628398037640  | 9.07500364708017  |
| C | -2.66474247219893 | 6.36458263759720  | 16.59929187578624 |
| H | -3.18960297373295 | 5.43231726142043  | 16.39813171062026 |
| C | 6.79334709761805  | 8.19880908689507  | 12.93121993061535 |
| C | 4.25350144256477  | 5.88572152457404  | 9.58810438421271  |
| H | 5.01719581578589  | 5.19127732198192  | 9.24764094901641  |
| C | 0.74910115129283  | 5.75684031231684  | 11.11089294770564 |
| H | 0.48454245068384  | 6.38841581522578  | 11.96775275694785 |
| C | -2.67279690569914 | 9.12349660139833  | 12.64904880979682 |
| H | -2.24778794615910 | 9.08411116531873  | 11.63871799340595 |
| B | 0.91767548346090  | 8.90713307594080  | 12.23878374175500 |
| C | -2.27569658519296 | 7.82909450821320  | 13.37354098382239 |
| H | -1.18851836529513 | 7.73163616350687  | 13.45671390238629 |
| H | -2.66097918897686 | 6.95344435541312  | 12.83692990103138 |

|   |                   |                   |                   |
|---|-------------------|-------------------|-------------------|
| H | -2.68935387090205 | 7.82294633459427  | 14.38613136146491 |
| C | 0.81345903004320  | 4.31477658285622  | 11.61907864246420 |
| H | 0.94193373417456  | 3.59738518597792  | 10.80008983762849 |
| H | -0.12539145553646 | 4.06245472246749  | 12.12389954939622 |
| H | 1.63226876553790  | 4.16911811039522  | 12.33239467923955 |
| C | -0.58692308315431 | 10.05518374859213 | 17.29462680677016 |
| H | 0.19322427050255  | 9.95350199107229  | 18.05759855936460 |
| H | -1.27839180964261 | 10.84271031699713 | 17.60197073063119 |
| H | -0.09520235838538 | 10.39469841256519 | 16.37376404519366 |
| C | -4.90038162800373 | 7.45964875753917  | 16.98914223428702 |
| H | -5.30138500334102 | 8.27571005885600  | 17.59692259093909 |
| H | -5.25621357547604 | 6.51284258986791  | 17.40699182871699 |
| H | -5.33014369931980 | 7.55409403097139  | 15.98352317833097 |
| C | -2.77045002539485 | 11.04270802530881 | 14.31759933342557 |
| H | -3.78146312050653 | 10.74591414355507 | 14.57918930185187 |
| C | -0.50721881919855 | 5.17159476736260  | 16.07071678336314 |
| H | -1.17717657837363 | 4.31968994243826  | 15.93033800741539 |
| H | 0.26046712462375  | 4.89036267422421  | 16.80041600254391 |
| H | 0.01635382116123  | 5.35017022124383  | 15.12165654763733 |
| C | 1.23375188661575  | 12.29761969730995 | 13.28897258866543 |
| H | 1.46325358625114  | 11.86786687955432 | 12.30703151071396 |
| C | 4.14019986782764  | 10.15118531170080 | 11.29876689735639 |
| H | 3.39092622670136  | 9.86232472171439  | 12.04158103026599 |
| H | 4.23801157751387  | 11.24360327127860 | 11.31139634097495 |
| H | 5.09401261262317  | 9.71411437969078  | 11.60937467291683 |
| C | -0.91329589666709 | 12.54754609325839 | 14.61555536372044 |
| H | -0.48559922319707 | 13.41860221152663 | 15.10431401537396 |
| C | 4.81740391836010  | 10.09342524936681 | 8.87624112716375  |
| H | 5.81874495050685  | 9.74736123534991  | 9.15815061144486  |
| H | 4.85736207356555  | 11.18668121907239 | 8.82726936356248  |
| H | 4.59585527598027  | 9.71467359728650  | 7.87263023070392  |
| C | -2.19897394693483 | 12.14226037720955 | 14.94661781593183 |
| H | -2.76476704680747 | 12.69273669167171 | 15.69392942128826 |
| C | 7.89378810776611  | 8.35558848801834  | 11.91785251765525 |
| H | 7.54096385304162  | 8.92556162964884  | 11.04800597858413 |
| H | 8.23964317485524  | 7.38434864277351  | 11.55241599637056 |
| H | 8.75058249590890  | 8.89330061897517  | 12.33504167801856 |
| C | 2.25295619163431  | 11.73479912980944 | 14.28965883718382 |
| H | 2.04584568772915  | 12.10378941399017 | 15.30217689292425 |
| H | 3.27333297093790  | 12.02771369213324 | 14.01680825984477 |
| H | 2.21369021533195  | 10.63905588485738 | 14.30227467485301 |
| C | -0.36772372824453 | 5.89679049477568  | 10.06387533497799 |
| H | -0.48317251072023 | 6.93542252000634  | 9.74253856367856  |
| H | -1.32471907324905 | 5.55993276736850  | 10.47940303588602 |
| H | -0.14217363635615 | 5.28437190826925  | 9.18271899534775  |
| C | -4.19484572827726 | 9.20595049318874  | 12.51119247638568 |
| H | -4.69627506231178 | 9.10943407204559  | 13.48132721837126 |
| H | -4.55401899391795 | 8.38679663151796  | 11.87935918570378 |
| H | -4.50962636490736 | 10.15189216522061 | 12.05766954858662 |
| C | 1.37399690208347  | 13.81930908002849 | 13.17806101355828 |
| H | 0.60881178139301  | 14.24108577210339 | 12.51854413272241 |

|                                                                             |                   |                   |                   |
|-----------------------------------------------------------------------------|-------------------|-------------------|-------------------|
| H                                                                           | 2.35791681048499  | 14.07334044361921 | 12.76913631929695 |
| H                                                                           | 1.29113332786567  | 14.31168533953158 | 14.15340298613594 |
| <b>{{(HCDippN)<sub>2</sub>}BOBpin (6): -1634.929067902274 E<sub>h</sub></b> |                   |                   |                   |
| N                                                                           | -0.27767672420927 | 9.42334436577732  | 12.03597161894040 |
| N                                                                           | 1.05407548357170  | 8.22094710087637  | 10.62463590420619 |
| C                                                                           | -0.89793908864084 | 10.01437076174841 | 13.17183385162329 |
| C                                                                           | 2.03918285628917  | 7.37591528596370  | 10.03297344001831 |
| C                                                                           | -0.54052258376547 | 9.80678823130487  | 10.71140455350665 |
| H                                                                           | -1.27453139924964 | 10.56413597293417 | 10.47660534266072 |
| C                                                                           | 3.31935417084815  | 7.89890552438230  | 9.78303549152910  |
| C                                                                           | 0.24836159190121  | 9.09325738938099  | 9.87503711887983  |
| H                                                                           | 0.30910242207340  | 9.12819814238430  | 8.79662364614057  |
| C                                                                           | -2.24180091904982 | 9.71523298427296  | 13.45954408182512 |
| C                                                                           | 1.70865565492961  | 6.04569690665699  | 9.72964400163563  |
| C                                                                           | -0.13569569223634 | 10.85772078099751 | 14.00087555150896 |
| C                                                                           | 3.66418047355870  | 9.32927259015195  | 10.15588224582716 |
| H                                                                           | 2.72667225063541  | 9.89559564002169  | 10.20510778535828 |
| C                                                                           | 2.70318525471720  | 5.22944404247613  | 9.18750101465614  |
| H                                                                           | 2.47865556537268  | 4.19308556996301  | 8.95210625022234  |
| C                                                                           | 4.28030373543085  | 7.04813471986027  | 9.23573695330397  |
| H                                                                           | 5.28052117388928  | 7.42217609066823  | 9.03804973871230  |
| C                                                                           | 3.97677174431658  | 5.72446319261221  | 8.94391803474320  |
| H                                                                           | 4.73856149730736  | 5.07509775572343  | 8.52138591882470  |
| C                                                                           | 0.32808191748939  | 5.49088630107379  | 10.02512426561503 |
| H                                                                           | -0.34995047530986 | 6.34179075635485  | 10.15760900566340 |
| C                                                                           | -3.07947771916563 | 8.83238050400592  | 12.55353684805544 |
| H                                                                           | -2.42812127725678 | 8.44344998928776  | 11.76395387729665 |
| B                                                                           | 0.74320249395657  | 8.41037755333230  | 12.01093729487811 |
| C                                                                           | -3.66051098456920 | 7.62496869616465  | 13.29875032102023 |
| H                                                                           | -2.85683660886606 | 7.03086300828283  | 13.74049943517413 |
| H                                                                           | -4.22508925547413 | 6.99170972149974  | 12.60502082871517 |
| H                                                                           | -4.34489874138905 | 7.93362884971411  | 14.09724045171924 |
| C                                                                           | 0.34572659276120  | 4.69837698639444  | 11.34176903529595 |
| H                                                                           | 1.00814087072109  | 3.82888246153467  | 11.25660875141802 |
| H                                                                           | -0.66009794213644 | 4.34185045795120  | 11.59205745787653 |
| H                                                                           | 0.70716915397828  | 5.31848014261426  | 12.16769194264242 |
| C                                                                           | -2.80596925563966 | 10.26444262107796 | 14.61044886116454 |
| H                                                                           | -3.84234896392283 | 10.04596248508724 | 14.85489062493070 |
| C                                                                           | 1.28548054364669  | 11.26840627998264 | 13.65627092325660 |
| H                                                                           | 1.57555032366145  | 10.75063383711345 | 12.73555213666610 |
| C                                                                           | 4.30816222811118  | 9.37027074655575  | 11.55144261361346 |
| H                                                                           | 3.66035806509453  | 8.91157072807682  | 12.30497419442841 |
| H                                                                           | 4.51063820196659  | 10.40580065046590 | 11.84998547887850 |
| H                                                                           | 5.25871547659314  | 8.82380241389997  | 11.54859551822005 |
| C                                                                           | -0.74028206818962 | 11.37009033247475 | 15.15117381226526 |
| H                                                                           | -0.17038437296873 | 12.02101332160834 | 15.80930365492193 |
| C                                                                           | 4.56217636176267  | 10.01888992679359 | 9.12388721894623  |
| H                                                                           | 5.57111454555915  | 9.59257647372857  | 9.10976449922550  |
| H                                                                           | 4.66387350005949  | 11.08115450828855 | 9.37042150481447  |



|   |                   |                   |                   |
|---|-------------------|-------------------|-------------------|
| H | 4.14538458094499  | 9.93926867093296  | 8.11452048274983  |
| C | -2.06089495068698 | 11.07431249791927 | 15.45826414447513 |
| H | -2.51521694973932 | 11.48474732800939 | 16.35597073921612 |
| C | 2.28836997897480  | 10.87413116267311 | 14.74737115735774 |
| H | 2.05867566944093  | 11.36910888330626 | 15.69820091767124 |
| H | 3.30118364354111  | 11.17073199258351 | 14.45315805041331 |
| H | 2.29016662891271  | 9.79361527137177  | 14.91878563491658 |
| C | -0.22382237184823 | 4.63266244240774  | 8.88145050393301  |
| H | -0.19229409315399 | 5.17144772677035  | 7.92892830101040  |
| H | -1.26436750086180 | 4.35986705258475  | 9.08785143994608  |
| H | 0.33902178556442  | 3.70054732505809  | 8.76275047441895  |
| C | -4.19316948428417 | 9.64998289611272  | 11.88196740425694 |
| H | -4.90141525212988 | 10.03395072268023 | 12.62508710835871 |
| H | -4.75139083214933 | 9.02796755033480  | 11.17343309920074 |
| H | -3.78452320442236 | 10.50827656805932 | 11.33857370529514 |
| C | 1.35108241238437  | 12.77591824702027 | 13.36879029024302 |
| H | 0.64201664433717  | 13.05742718776992 | 12.58359886882024 |
| H | 2.35835873391564  | 13.05623320450504 | 13.04086570818634 |
| H | 1.11327772609229  | 13.36206288758572 | 14.26376735231792 |
| B | 0.90335569856757  | 7.38630455623714  | 14.27032403539840 |
| O | 1.73853987493220  | 7.15621492355490  | 15.33795776122884 |
| O | -0.42158617369412 | 7.11584470946919  | 14.53216784621564 |
| C | 0.87640059412919  | 6.94732572037502  | 16.49556170228996 |
| C | -0.46291356034347 | 6.45804384858192  | 15.83515412717292 |
| C | 1.53439329781554  | 5.93856252325247  | 17.41978843231342 |
| C | 0.73169636613592  | 8.29987095896571  | 17.18854018370363 |
| C | -0.48535633729384 | 4.95627659553280  | 15.56614948728269 |
| C | -1.71882567136203 | 6.89256036930128  | 16.57100204193672 |
| H | 0.86800659306538  | 5.69245794811792  | 18.25369625750051 |
| H | 1.79323411333670  | 5.01896524817905  | 16.89116568309152 |
| H | 2.45306238760673  | 6.36545129688448  | 17.83306051255255 |
| H | 0.15865655580651  | 8.21361031869512  | 18.11706224130179 |
| H | 1.72906516406354  | 8.67900513183243  | 17.43071332602787 |
| H | 0.23725912406757  | 9.02869981227190  | 16.53776626171865 |
| H | -0.58521281932554 | 4.38462858284413  | 16.49427865268786 |
| H | -1.34173099964111 | 4.72688373859880  | 14.92488781573178 |
| H | 0.42385664430839  | 4.63250106733777  | 15.04955479559924 |
| H | -1.69824164149406 | 6.52719477213115  | 17.60361822784869 |
| H | -1.81775764332178 | 7.98058440218253  | 16.57806461509044 |
| H | -2.60249275675242 | 6.47287560650410  | 16.08173144872267 |
| O | 1.38360794639730  | 7.80643544994263  | 13.07083606096923 |

**Nacnac<sup>Mes</sup>Zn(DMAP)Bpin (2): -3577.947517146553 E<sub>h</sub>**

|    |                   |                   |                   |
|----|-------------------|-------------------|-------------------|
| Zn | -1.26553191673102 | 9.20671671871936  | 15.25186422618441 |
| O  | 0.62814103947869  | 8.95479881441431  | 12.82191992819689 |
| O  | 0.36528032194073  | 6.96907404899294  | 13.91345855822676 |
| N  | -1.06392003773432 | 9.37679795263189  | 17.26035161109705 |
| N  | -3.23414404414391 | 8.70999275545253  | 15.38177745620870 |
| N  | -1.52908695091188 | 11.29520777089302 | 14.80891942924737 |

|   |                   |                   |                   |
|---|-------------------|-------------------|-------------------|
| N | -2.16731187117123 | 15.32451903815807 | 13.87917139410685 |
| C | -3.94417620553340 | 8.76278782690625  | 16.49763279302369 |
| C | 0.27484094683242  | 9.36954430087198  | 17.74286749969442 |
| C | -1.95655840408870 | 14.01361082010496 | 14.18365343195196 |
| C | -0.88916569858478 | 11.88352962182920 | 13.78554778262874 |
| H | -0.21024017985852 | 11.24411579905140 | 13.22309972612208 |
| C | -3.78508436822343 | 8.11529808565273  | 14.21250446333112 |
| C | -2.07306614194328 | 9.33398643407010  | 18.11815566495661 |
| C | -2.62225873772952 | 13.38259550188070 | 15.26002643524619 |
| H | -3.32436641605613 | 13.91701385445641 | 15.88781789729889 |
| C | 0.96190396124200  | 10.57013083073125 | 17.98277179435226 |
| C | -3.42170439523415 | 9.15629630439873  | 17.74741536416273 |
| H | -4.13427310476222 | 9.17767826726401  | 18.56327070485789 |
| C | -1.06287572691330 | 13.20884228336104 | 13.44077689278275 |
| H | -0.50613343476579 | 13.60418008719275 | 12.60032389318660 |
| C | 0.92749093711957  | 8.13556286555375  | 17.90783189838368 |
| C | -5.39411309526736 | 8.33131165259412  | 16.46894299648225 |
| H | -5.93710563272217 | 8.81330884468875  | 15.64963077116276 |
| H | -5.89260034311823 | 8.55574714577229  | 17.41366491507839 |
| H | -5.46121237817722 | 7.25153965165966  | 16.28917057075596 |
| C | 1.58355134526437  | 8.03202607580994  | 12.21378632870030 |
| C | -4.44027254136962 | 8.89624037930226  | 13.24751893985695 |
| C | 2.28936571473082  | 10.51310303253106 | 18.40768077141137 |
| H | 2.81686115071809  | 11.44528859973450 | 18.60557961334156 |
| C | 2.95665978459078  | 9.30245705695284  | 18.58263909446783 |
| C | -2.37849293749274 | 12.05155286502302 | 15.52227636220139 |
| H | -2.88659594640651 | 11.54957684709012 | 16.34509156086150 |
| C | -4.62801498089666 | 10.37564179980695 | 13.44120480757852 |
| H | -3.70263750322077 | 10.91804092198689 | 13.21372369902822 |
| H | -4.88977574184495 | 10.62660707342213 | 14.47351062815040 |
| H | -5.41195195163585 | 10.75545499486912 | 12.77948052294114 |
| C | 2.25672910223635  | 8.12466342147698  | 18.32747464060057 |
| H | 2.75662789845649  | 7.16645827216380  | 18.45911827102763 |
| C | -3.59329956680569 | 6.73860137821030  | 13.99626623571138 |
| C | 4.40052328980350  | 9.27151602350944  | 19.00753852808011 |
| H | 5.06778056102759  | 9.40307054960300  | 18.14645297948997 |
| H | 4.65638973484680  | 8.31750011118451  | 19.47794618528025 |
| H | 4.62452415983883  | 10.07339319295949 | 19.71836318544659 |
| C | -1.78036775358060 | 9.42858535426770  | 19.59986331680805 |
| H | -1.23584728915769 | 8.53650968096788  | 19.93179473401442 |
| H | -2.70102361673284 | 9.50827558032556  | 20.18051609835974 |
| H | -1.13459612917668 | 10.28328716634244 | 19.82528793196243 |
| C | 1.01824420291861  | 6.64545667544002  | 12.64990854737005 |
| C | 0.29685408016528  | 11.90255007379514 | 17.77160084144748 |
| H | 0.84133776096735  | 12.69313953123065 | 18.29619177363537 |
| H | -0.74148686290990 | 11.90481546524815 | 18.11653792148049 |
| H | 0.27161936037104  | 12.15998355275500 | 16.70593242501789 |
| C | 0.20509405092519  | 6.85200925603445  | 17.61176184284935 |
| H | 0.79927361377384  | 5.99024480228407  | 17.92810452289015 |
| H | 0.01734794849685  | 6.75997120906963  | 16.53455978936514 |
| H | -0.77026754797415 | 6.80633318455014  | 18.10831062515848 |

|   |                   |                   |                   |
|---|-------------------|-------------------|-------------------|
| C | -4.90624690336926 | 8.28152217699090  | 12.08453199526003 |
| H | -5.42408197584109 | 8.88818079176188  | 11.34295010284350 |
| C | -3.06898833414687 | 16.12657773421233 | 14.69214581236577 |
| H | -4.09002972229802 | 15.72140727711195 | 14.68063267801040 |
| H | -3.10671973706630 | 17.14095584464822 | 14.29280121583255 |
| H | -2.73323848037799 | 16.18485568020135 | 15.73735042490094 |
| C | -1.43828710185272 | 15.94562152516713 | 12.78379448954290 |
| H | -0.35227017840812 | 15.92587552602433 | 12.95340972673260 |
| H | -1.74733405685107 | 16.98769161124066 | 12.69197701308686 |
| H | -1.64654038513497 | 15.44660099962431 | 11.82762526362192 |
| C | -2.86025101937157 | 5.90466533755352  | 15.00767228455904 |
| H | -2.96012537451184 | 4.84021856635251  | 14.77684799241215 |
| H | -3.22395857253546 | 6.07728595690756  | 16.02621205258793 |
| H | -1.79234011027148 | 6.15558879139963  | 15.00229128997870 |
| B | 0.02293614467769  | 8.31688073157744  | 13.90249638014754 |
| C | -4.07049392323907 | 6.16684336336941  | 12.81828022478338 |
| H | -3.92390723837612 | 5.09986678666656  | 12.65705766606767 |
| C | 2.94706431838104  | 8.34223713327858  | 12.82935413523168 |
| H | 3.18149606839142  | 9.39666932443945  | 12.65454558016698 |
| H | 3.73963788651468  | 7.73319722110851  | 12.38139653934403 |
| H | 2.93458780514179  | 8.17239302505781  | 13.91030001957622 |
| C | 1.61176475786661  | 8.27158563620232  | 10.71382409595862 |
| H | 0.61181576734759  | 8.20996263023565  | 10.27937439068170 |
| H | 2.25794707262806  | 7.53764391007084  | 10.21841480393719 |
| H | 2.01331742101697  | 9.26903019344319  | 10.50891488744611 |
| C | -4.72688105162236 | 6.92096580235294  | 11.84699739467886 |
| C | 2.06579937863317  | 5.57326565862179  | 12.89774287110351 |
| H | 2.75942553626272  | 5.86814565564713  | 13.68784724709862 |
| H | 2.63534225683707  | 5.37111996747664  | 11.98332952819973 |
| H | 1.57421570015284  | 4.64494545124974  | 13.20461443469272 |
| C | -5.20277806972058 | 6.28810629909843  | 10.56660443856796 |
| H | -6.07423123527803 | 6.81240194524293  | 10.16255650428035 |
| H | -5.47509404860167 | 5.23908696135406  | 10.71820044633717 |
| H | -4.41893669050920 | 6.31485290508029  | 9.79908627097158  |
| C | -0.07368688426667 | 6.12145755048355  | 11.71739243415303 |
| H | -0.56546565474143 | 5.26989732448132  | 12.19789883418369 |
| H | 0.33820099594650  | 5.78887568306445  | 10.75842225620661 |
| H | -0.83594087427613 | 6.88566261595050  | 11.53541945118655 |

**[Nacnac<sup>Mes</sup>Zn]<sub>2</sub>(VIII): -5567.498683630937 E<sub>h</sub>**

|    |                  |                  |                   |
|----|------------------|------------------|-------------------|
| Zn | 2.64300758150056 | 2.28642526406573 | 5.81276762161217  |
| N  | 2.03342380440939 | 1.57602673351300 | 7.56362145273025  |
| N  | 4.28670080060830 | 3.10904935583277 | 6.56783267122283  |
| C  | 2.70897416462438 | 1.67859941902235 | 8.70442870141882  |
| C  | 3.94024553125163 | 2.34354443838709 | 8.82638673099562  |
| H  | 4.37672084552565 | 2.34657191654596 | 9.81766159109818  |
| C  | 4.66485202361652 | 3.03267332750375 | 7.83901991374136  |
| C  | 2.13005561952597 | 1.05592540414187 | 9.95411131806192  |
| H  | 1.17311887914037 | 1.52193025438396 | 10.21333119795595 |
| H  | 2.81202195356203 | 1.16013572819544 | 10.79944608353056 |

|    |                   |                   |                   |
|----|-------------------|-------------------|-------------------|
| H  | 1.91963833745642  | -0.00713668493024 | 9.79376302073310  |
| C  | 5.93912825588554  | 3.72353676939099  | 8.26615742428139  |
| H  | 6.79873470277744  | 3.33606905547675  | 7.70835352787102  |
| H  | 6.12149538210506  | 3.59199463851847  | 9.33386573292856  |
| H  | 5.88743733837717  | 4.79523813248032  | 8.04419088187690  |
| C  | 0.75100526755024  | 0.96229862150509  | 7.55151677895013  |
| C  | -0.38704078500299 | 1.73549717494756  | 7.82443894541841  |
| C  | -1.63821846008401 | 1.12075605779301  | 7.78408271562769  |
| H  | -2.52083069566166 | 1.71730174377987  | 8.00786778908926  |
| C  | -1.78686158101102 | -0.22310080307772 | 7.44798450273359  |
| C  | -0.64113733292457 | -0.95868030911241 | 7.14362438650270  |
| H  | -0.73785736205911 | -2.00749955953545 | 6.86713704609573  |
| C  | 0.62950127763432  | -0.38746599659674 | 7.18587633390518  |
| C  | -0.25485132269176 | 3.20278707600893  | 8.11752645100502  |
| H  | -1.22051172590050 | 3.63062156785431  | 8.39908847567480  |
| H  | 0.09825004418182  | 3.73872510907657  | 7.22596875051890  |
| H  | 0.46707749446374  | 3.40429402400823  | 8.91620906318229  |
| C  | -3.14948891510594 | -0.85691189132425 | 7.36752407232035  |
| H  | -3.89436595413214 | -0.26926000674546 | 7.91182246896004  |
| H  | -3.14394393134557 | -1.86978167461516 | 7.78300024180326  |
| H  | -3.48583999944737 | -0.93573327141008 | 6.32580827489071  |
| C  | 1.85454683375523  | -1.18809343441223 | 6.84517964143024  |
| H  | 1.58773429990710  | -2.20914908924743 | 6.55984669690580  |
| H  | 2.55720814287599  | -1.23545396360887 | 7.68527318317116  |
| H  | 2.40245133375378  | -0.72762517537680 | 6.01261075188564  |
| C  | 5.07051709151048  | 3.83672464025954  | 5.63152583517302  |
| C  | 6.08758290536050  | 3.18478903654028  | 4.92020566239216  |
| C  | 6.82143780952144  | 3.91433845158846  | 3.98454780804288  |
| H  | 7.61973243034716  | 3.41275767528615  | 3.44053328912960  |
| C  | 6.54576680802702  | 5.25242487435780  | 3.71451056000005  |
| C  | 5.50228823294939  | 5.86566937881855  | 4.40910224417845  |
| H  | 5.26293241076176  | 6.90778421186094  | 4.20260075649991  |
| C  | 4.75583685640362  | 5.17955378902641  | 5.36518338834799  |
| C  | 6.35029141725758  | 1.72219625069917  | 5.13802831239190  |
| H  | 7.24596348394262  | 1.40450513283513  | 4.59798753797512  |
| H  | 5.50836280712801  | 1.12399732639511  | 4.76342464050072  |
| H  | 6.46978725572009  | 1.47468014250371  | 6.19814366725302  |
| C  | 7.31775135510692  | 6.00914464309914  | 2.66744193675499  |
| H  | 7.59263477638493  | 7.00940240262806  | 3.01820629783925  |
| H  | 6.72000924739296  | 6.13832210178552  | 1.75625376090953  |
| H  | 8.23495025156669  | 5.48153785435853  | 2.39056914745999  |
| C  | 3.62800746699279  | 5.85076419398473  | 6.09775383657129  |
| H  | 3.50236086824563  | 6.88235720884236  | 5.75808970048299  |
| H  | 3.79337156319259  | 5.86235855769464  | 7.18149752777189  |
| H  | 2.68096260805946  | 5.31844036658531  | 5.93833657601635  |
| Zn | 1.76519431368122  | 2.28717101252798  | 3.64876826035315  |
| N  | 2.37419994823698  | 1.57697205515855  | 1.89769353832478  |
| N  | 0.12195156070401  | 3.11149821054290  | 2.89387480884532  |
| C  | 1.69845920707474  | 1.68004918179999  | 0.75700890738855  |
| C  | 0.46776836747360  | 2.34606267282164  | 0.63521243888033  |
| H  | 0.03125820876965  | 2.34958538578776  | -0.35604494010298 |

|   |                   |                   |                   |
|---|-------------------|-------------------|-------------------|
| C | -0.25615547022863 | 3.03580912466208  | 1.62265635102767  |
| C | 2.27650718580546  | 1.05668123818491  | -0.49274471911502 |
| H | 3.23408979123103  | 1.52129220030094  | -0.75203772155826 |
| H | 1.59461827745930  | 1.16181391467458  | -1.33802682525712 |
| H | 2.48540450566906  | -0.00668434541298 | -0.33238382402917 |
| C | -1.52957629491427 | 3.72825783669441  | 1.19551818686079  |
| H | -2.38974298991020 | 3.34160940515699  | 1.75302390986627  |
| H | -1.71189882326501 | 3.59728915360086  | 0.12773193460580  |
| H | -1.47666646468820 | 4.79982062743029  | 1.41786684686409  |
| C | 3.65625364788277  | 0.96245644419438  | 1.90924235331614  |
| C | 4.79459870257808  | 1.73486786198635  | 1.63527524814513  |
| C | 6.04539385300444  | 1.11931817643541  | 1.67473617991175  |
| H | 6.92823077741457  | 1.71523191555917  | 1.45015222962222  |
| C | 6.19343713997782  | -0.22459081786530 | 2.01094875744069  |
| C | 5.04748720956212  | -0.95934989190514 | 2.31638408904221  |
| H | 5.14372285569336  | -2.00818130014993 | 2.59299672238013  |
| C | 3.77717505802639  | -0.38730862008662 | 2.27504019477214  |
| C | 4.66307656526918  | 3.20215387160735  | 1.34183885593770  |
| H | 5.62900318996933  | 3.62960404023356  | 1.06061001873421  |
| H | 4.30967927599896  | 3.73839405708088  | 2.23307903765257  |
| H | 3.94160829613819  | 3.40372677751863  | 0.54274170800459  |
| C | 7.55572779113322  | -0.85923974812023 | 2.09044541168041  |
| H | 8.30072892630636  | -0.27169232323390 | 1.54620969359847  |
| H | 7.54943968401241  | -1.87184346622382 | 1.67431898571697  |
| H | 7.89244015227471  | -0.93891672951081 | 3.13197652275406  |
| C | 2.55188350959424  | -1.18717376905265 | 2.61663506669449  |
| H | 2.81832466647753  | -2.20821209833961 | 2.90237701231767  |
| H | 1.84892296471288  | -1.23463878239003 | 1.77679202913092  |
| H | 2.00446398485892  | -0.72604377074607 | 3.44915345509268  |
| C | -0.66120627518957 | 3.83974171652599  | 3.83025741403968  |
| C | -1.67949371551395 | 3.18880009318333  | 4.54087983227117  |
| C | -2.41306271538729 | 3.91897391731733  | 5.47618515071468  |
| H | -3.21235783860178 | 3.41829461948730  | 6.01957880829103  |
| C | -2.13603933251655 | 5.25677647728553  | 5.74662159029350  |
| C | -1.09145546809394 | 5.86890509546024  | 5.05284277279724  |
| H | -0.85107904137040 | 6.91074411456807  | 5.25950298467141  |
| C | -0.34510146083453 | 5.18206404849751  | 4.09711242413416  |
| C | -1.94392672849585 | 1.72663241022340  | 4.32225526859590  |
| H | -2.83938110057453 | 1.40947523831211  | 4.86296747444796  |
| H | -1.10222328380920 | 1.12728057142489  | 4.69547138054394  |
| H | -2.06484258679408 | 1.48004574739432  | 3.26207077699211  |
| C | -2.90765648713404 | 6.01381224290894  | 6.79371325097285  |
| H | -3.16880104868542 | 7.01971075119276  | 6.44878988823193  |
| H | -2.31553883347948 | 6.12925331110818  | 7.71045864240975  |
| H | -3.83262686725161 | 5.49419796512397  | 7.05969781480762  |
| C | 0.78375763006949  | 5.85225243689384  | 3.36518915024743  |
| H | 0.91061334735144  | 6.88350402113528  | 3.70544332986449  |
| H | 0.61865639979668  | 5.86465403012965  | 2.28140964011874  |
| H | 1.73011333753537  | 5.31867749931471  | 3.52452875483176  |

**B<sub>2</sub>pin<sub>2</sub>: -823.230375444391 E<sub>h</sub>**

|   |                   |                   |                   |
|---|-------------------|-------------------|-------------------|
| B | 2.99647900353390  | 7.63231442239154  | 4.06880138345847  |
| O | 1.71731978187177  | 7.17740910901088  | 3.85202156783805  |
| O | 3.59569910721975  | 8.10143587688927  | 2.92390221534774  |
| C | 1.50439144922485  | 7.14191401881129  | 2.40628823254165  |
| C | 2.56648832135963  | 8.16966958057668  | 1.88799062955685  |
| C | 0.05974267529106  | 7.51005098666192  | 2.11445723968233  |
| C | 1.78790264588254  | 5.70905948314124  | 1.96121330065336  |
| C | 2.05588252001086  | 9.60860061230225  | 1.88087759079686  |
| C | 3.19563902120082  | 7.82407300652325  | 0.54909582098991  |
| H | -0.10860356145079 | 7.57132546294021  | 1.03361458915338  |
| H | -0.21099139528627 | 8.46551595705514  | 2.56770262587917  |
| H | -0.60255900134467 | 6.73985554225316  | 2.52050423568369  |
| H | 1.58783061136296  | 5.57601225250869  | 0.89322545029313  |
| H | 1.13905123461885  | 5.03116748285422  | 2.52307290965889  |
| H | 2.82701503234689  | 5.43084605015237  | 2.16206963559285  |
| H | 1.32180638018239  | 9.76912273747494  | 1.08480944191630  |
| H | 2.90229460511230  | 10.28082822999508 | 1.71402205398941  |
| H | 1.59849279220583  | 9.86867531643926  | 2.84029917313629  |
| H | 2.43239906454102  | 7.79329890066217  | -0.23626624699273 |
| H | 3.70648996351157  | 6.85986035997933  | 0.58133419270878  |
| H | 3.92930546761676  | 8.59039091538860  | 0.28231339114695  |
| B | 3.75515838328411  | 7.61768442312303  | 5.59104708386602  |
| O | 5.03431617004404  | 8.07259389668102  | 5.80782679451489  |
| O | 3.15594054949252  | 7.14855940099526  | 6.73594597200860  |
| C | 5.24724503085427  | 8.10808816453954  | 7.25356007271885  |
| C | 4.18515214413024  | 7.08032812415630  | 7.77185693554083  |
| C | 6.69189533013489  | 7.73995625594299  | 7.54539010757866  |
| C | 4.96372884619389  | 9.54094118390420  | 7.69863672682009  |
| C | 4.69576323521996  | 5.64139896094510  | 7.77896779675303  |
| C | 3.55600097439349  | 7.42592069916558  | 9.11075254458754  |
| H | 6.86024223165445  | 7.67868135271049  | 8.62623262880590  |
| H | 6.96263276493435  | 6.78449273681250  | 7.09214367295325  |
| H | 7.35419400983545  | 8.51015454127284  | 7.13934360649596  |
| H | 5.16380084814770  | 9.67398797201758  | 8.76662464383819  |
| H | 5.61257759787193  | 10.21883610231875 | 7.13677757157077  |
| H | 3.92461539722164  | 9.81915118868052  | 7.49778115063802  |
| H | 5.42984059750986  | 5.48087858734135  | 8.57503518155547  |
| H | 3.84935375376542  | 4.96916803046555  | 7.94582319691846  |
| H | 5.15315313922848  | 5.38132715442136  | 6.81954550450191  |
| H | 4.31924131128947  | 7.45669663055966  | 9.89611416807490  |
| H | 3.04514646309679  | 8.39013150518658  | 9.07851566701614  |
| H | 2.82233750268491  | 6.65959978474801  | 9.37753454021103  |

## 8. References for SI

- S1 S. Schulz, T. Eisenmann, U. Westphal, S. Schmidt, U. Flörke, *Zeitschrift für anorganische und allgemeine Chemie* **2009**, *635*, 216-220.
- S2 J. Prust, A. Stasch, W. Zheng, H. W. Roesky, E. Alexopoulos, I. Usón, D. Böhler, T. Schuchardt, *Organometallics* **2001**, *20*, 3825-3828.
- S3 Y. K. Loh, L. Ying, M. Á. Fuentes, D. C. H. Do, S. Aldridge, *Angewandte Chemie International Edition* **2019**, *58*, 4847-4851.
- S4 J. Cosier, A. M. Glazer, *Journal of Applied Crystallography* **1986**, *19*, 105-107.
- S5 A. Technologies, **2011**.
- S6 G. Sheldrick, *Acta Crystallographica Section A* **2015**, *71*, 3-8.
- S7 G. Sheldrick, *Acta Crystallographica Section C* **2015**, *71*, 3-8.
- S8 O. V. Dolomanov, L. J. Bourhis, R. J. Gildea, J. A. K. Howard, H. Puschmann, *Journal of Applied Crystallography* **2009**, *42*, 339-341.
- S9 J. Bykowski, J. Sinclair, J. Trach, M. J. Ferguson, E. Rivard, *Dalton Transactions* **2023**, *52*, 1602-1607.
- S10 G. Bendt, S. Schulz, J. Spielmann, S. Schmidt, D. Bläser, C. Wölper, *European Journal of Inorganic Chemistry* **2012**, *2012*, 3725-3731.
- S11 F. Neese, *WIREs Computational Molecular Science* **2012**, *2*, 73-78.
- S12 F. Neese, *WIREs Computational Molecular Science* **2022**, *12*, e1606.
- S13 S. Grimme, A. Hansen, S. Ehlert, J.-M. Mewes, *The Journal of Chemical Physics* **2021**, *154*, 064103.
- S14 J.-D. Chai, M. Head-Gordon, *Physical Chemistry Chemical Physics* **2008**, *10*, 6615-6620.
- S15 E. Caldeweyher, C. Bannwarth, S. Grimme, *The Journal of Chemical Physics* **2017**, *147*, 034112.
- S16 F. Weigend, R. Ahlrichs, *Physical Chemistry Chemical Physics* **2005**, *7*, 3297-3305.
- S17 J. K. B. E. D. Glendening, A. E. Reed, J. E. Carpenter, J. A. Bohmann, C. M. Morales, P. Karafiloglou, C. R. Landis, F. Weinhold, **2018**.
- S18 E. D. Glendening, C. R. Landis, F. Weinhold, *Journal of Computational Chemistry* **2019**, *40*, 2234-2241.
- S19 T. Lu, F. Chen, *Journal of Computational Chemistry* **2012**, *33*, 580-592.
